# Supplementary material for: Additional value of volumetric and texture analysis on FDG PET assessment in paediatric Hodgkin lymphoma: an Italian multicentric study protocol
Source: PubMed Central journal article supplement — BMJ Open. 2021 Mar 29;11(3):e041252. doi: 10.1136/bmjopen-2020-041252 (PMC8009231; doi:10.1136/bmjopen-2020-041252), 2021-03-29
Supplement: bmjopen-2020-041252.draft_revisions.pdf [file bmjopen-2020-041252.draft_revisions.pdf]

# BMJ Open

BMJ Open is committed to open peer review. As part of this commitment we make the peer review history of every article we publish publicly available.

When an article is published we post the peer reviewers' comments and the authors' responses online. We also post the versions of the paper that were used during peer review. These are the versions that the peer review comments apply to.

The versions of the paper that follow are the versions that were submitted during the peer review process. They are not the versions of record or the final published versions. They should not be cited or distributed as the published version of this manuscript.

BMJ Open is an open access journal and the full, final, typeset and author-corrected version of record of the manuscript is available on our site with no access controls, subscription charges or pay-per-view fees (<http://bmjopen.bmj.com>).

If you have any questions on BMJ Open's open peer review process please email [info.bmjopen@bmj.com](mailto:info.bmjopen@bmj.com)

# BMJ Open

**Additional value of volumetric and texture analysis on FDG PET assessment in pediatric Hodgkin Lymphoma: methodology and potential clinical implications of an Italian multicentric trial.**

|                               |                                                                                                                                                                                                                                                     |
|-------------------------------|-----------------------------------------------------------------------------------------------------------------------------------------------------------------------------------------------------------------------------------------------------|
| Journal:                      | <i>BMJ Open</i>                                                                                                                                                                                                                                     |
| Manuscript ID                 | bmjopen-2020-041252                                                                                                                                                                                                                                 |
| Article Type:                 | Protocol                                                                                                                                                                                                                                            |
| Date Submitted by the Author: | 10-Jun-2020                                                                                                                                                                                                                                         |
| Complete List of Authors:     | Lopci, Egesta; Istituto Clinico Humanitas<br>Burnelli, Roberta<br>Elia, Caterina<br>Piccardo, Arnoldo; Ente Ospedaliero Ospedali Galliera,<br>Castello, Angelo<br>Borsatti, Eugenio<br>Zucchetta, Pietro<br>Cistaro, Angelina<br>Mascarin, Maurizio |
| Keywords:                     | Lymphoma < HAEMATOLOGY, Nuclear radiology < RADIOLOGY & IMAGING, Protocols & guidelines < HEALTH SERVICES ADMINISTRATION & MANAGEMENT                                                                                                               |
|                               |                                                                                                                                                                                                                                                     |

SCHOLARONE™  
Manuscripts

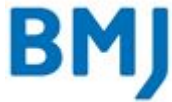

I, the Submitting Author has the right to grant and does grant on behalf of all authors of the Work (as defined in the below author licence), an exclusive licence and/or a non-exclusive licence for contributions from authors who are: i) UK Crown employees; ii) where BMJ has agreed a CC-BY licence shall apply, and/or iii) in accordance with the terms applicable for US Federal Government officers or employees acting as part of their official duties; on a worldwide, perpetual, irrevocable, royalty-free basis to BMJ Publishing Group Ltd ("BMJ") its licensees and where the relevant Journal is co-owned by BMJ to the co-owners of the Journal, to publish the Work in this journal and any other BMJ products and to exploit all rights, as set out in our [licence](#).

The Submitting Author accepts and understands that any supply made under these terms is made by BMJ to the Submitting Author unless you are acting as an employee on behalf of your employer or a postgraduate student of an affiliated institution which is paying any applicable article publishing charge ("APC") for Open Access articles. Where the Submitting Author wishes to make the Work available on an Open Access basis (and intends to pay the relevant APC), the terms of reuse of such Open Access shall be governed by a Creative Commons licence – details of these licences and which [Creative Commons](#) licence will apply to this Work are set out in our licence referred to above.

Other than as permitted in any relevant BMJ Author's Self Archiving Policies, I confirm this Work has not been accepted for publication elsewhere, is not being considered for publication elsewhere and does not duplicate material already published. I confirm all authors consent to publication of this Work and authorise the granting of this licence.

1  
2  
3  
4  
5  
6  
7  
8  
9  
10  
11  
12



**Additional value of volumetric and texture analysis on FDG PET assessment in pediatric Hodgkin Lymphoma: methodology and potential clinical implications of an Italian multicentric trial.**

13 Egesta Lopci (1), Roberta Burnelli (2), Caterina Elia (3), Arnoldo Piccardo (4), Angelo  
14 Castello (1), Eugenio Borsatti (5), Pietro Zucchetta (6), Angelina Cistaro (4), Maurizio  
15 Mascarin (3) and AIEOP Hodgkin Lymphoma Study Group.  
16  
17  
18  
19  
20

- 21  
22  
23  
24  
25  
26  
27  
28  
29  
30  
31  
32  
33  
34  
35
1. Nuclear Medicine department, Humanitas Clinical and Research Hospital – IRCCS, Via Manzoni 56, 20089 Rozzano (MI), Italy;
  2. Pediatric Onco-hematologic Unit, University Hospital S. Anna, Ferrara, Italy.
  3. AYA and Pediatric Radiotherapy, IRCCS Centro di Riferimento Oncologico, Aviano, PN,
  4. Nuclear Medicine, Galliera Hospital, Genoa, Italy.
  5. Nuclear Medicine, Centro di Riferimento Oncologico, Aviano, Pordenone, Italy
  6. Nuclear Medicine Department, University Hospital, Padova, Italy.

36  
37  
38  
39  
40  
41  
42  
43  
44  
45  
46  
47  
48  
49  
50  
51  
52  
53  
54  
55  
56  
57  
58  
59  
60

**Corresponding author:**

Egest Lopci, MD, PhD

Nuclear Medicine department

Humanitas Clinical and Research Hospital – IRCCS

Via Manzoni 56, CAP 20089, Rozzano (MI), Italy

Email: [egesta.lopci@gmail.com](mailto:egesta.lopci@gmail.com)

[egesta.lopci@cancercenter.humanitas.it](mailto:egesta.lopci@cancercenter.humanitas.it)

Roberta Burnelli, MD

Pediatric Onco-hematologic Unit

University Hospital S. Anna, Ferrara

Email: [roberta.burnelli@unife.it](mailto:roberta.burnelli@unife.it)

Caterina Elia

AYA and Pediatric Radiotherapy

1  
2  
3 IRCCS Centro di Riferimento Oncologico

4 Email: [eliacaterina@libero.it](mailto:eliacaterina@libero.it);  
5  
6  
7

8 Arnaldo Piccardo, MD

9 Nuclear Medicine department

10 Galliera Hospital, Genoa, Italy.

11 Email: [arnaldo.piccardo@galliera.it](mailto:arnaldo.piccardo@galliera.it)  
12  
13  
14  
15  
16

17 Angelo Castello, MD

18 Nuclear Medicine department

19 Humanitas Clinical and Research Hospital – IRCCS

20 Via Manzoni 56, CAP 20089, Rozzano (MI), Italy

21 Email: [angelo.castello@humanitas.it](mailto:angelo.castello@humanitas.it)  
22  
23  
24  
25  
26

27 Eugenio Borsatti, MD

28 Nuclear Medicine department

29 Centro di Riferimento Oncologico, Aviano, Pordenone, Italy

30 Email: [eborsatti@cro.it](mailto:eborsatti@cro.it)  
31  
32  
33  
34  
35

36 Pietro Zucchetta, MD

37 Nuclear Medicine Department

38 University Hospital, Padova, Italy

39 Email: [pietro.zucchetta@unipd.it](mailto:pietro.zucchetta@unipd.it)  
40  
41  
42  
43  
44

45 Angelina Cistaro, MD

46 Nuclear Medicine department

47 Galliera Hospital, Genoa, Italy.

48 Email: [angelina.cistaro@galliera.it](mailto:angelina.cistaro@galliera.it)  
49  
50  
51  
52

53 Maurizio Mascarin, MD

54 AYA and Pediatric Radiotherapy

55 IRCCS Centro di Riferimento Oncologico

56 Email: [phl.italy@cro.it](mailto:phl.italy@cro.it); [mascarin@cro.it](mailto:mascarin@cro.it)  
57  
58  
59  
60

## ABSTRACT

**Introduction:** Assessment of response to therapy in pediatric Hodgkin lymphoma (HL) patients by  $^{18}\text{F}$ -fluorodeoxyglucose PET/CT (FDG PET) has become a powerful tool for the discrimination of responders from non-responders. The addition of volumetric and texture analyses can be regarded as a valuable help for disease prognostication and biological characterization. Based on these premises, the AIEOP Hodgkin Lymphoma Study Group has designed a prospective evaluation of volumetric and texture analysis in the Italian cohort of patients enrolled in the EuroNet-PHL-C2.

**Methods and Analysis:** The primary objective is to compare volumetric assessment in HL patients at baseline and during the course of therapy with standard visual and semi-quantitative analyses. The secondary objective is to identify the impact of volumetric and texture analysis on bulky masses. The tertiary objective is to determine the additional value of multiparametric assessment in patients having a partial response on morphological imaging.

The overall cohort of the study is expected to be round 400-500 patients, with approximately half presenting with bulky masses. All PET scans of the Italian cohort will be analyzed for volumetric assessment, comprising metabolic tumor volume (MTV) and total lesion glycolysis (TLG) at baseline and during the course of therapy. A dedicated software will delineate semi-automatically contours using different threshold methods, and the impact of each segmentation techniques will be evaluated. Bulky will be defined on contiguous lymph node masses  $\geq 200\text{ml}$  on CT/MRI. All bulky masses will be outlined and analyzed by the same software to provide textural features. Morphological assessment will be based in RECIL 2017 for response definition.

**Ethics and Dissemination:** The current study has been ethically approved (AIFA/SC/P/27087 approved 09/03/2018; EudraCT 2012-004053-88, EM-04). The results of the different analyses performed during and after study completion the will be actively disseminated through peer-reviewed journals, conference presentations, social media, print media and internet.

**Keywords:** FDG PET; Hodgkin's lymphoma; pediatric; volumetric analysis; response assessment; texture analysis; bulky masses; interim evaluation.

## BACKGROUND

<sup>18</sup>F-fluorodeoxyglucose positron emission tomography (FDG PET) has become a standard diagnostic procedure for the assessment of response to therapy in adults and children with Hodgkin lymphoma. International guidelines recommend the using of Deauville five-point scale as a visual method for discriminating responders from non-responder patients [1, 2]. In 2014, the pediatric German group proposed the use of qPET with the intent to extend the Deauville score to a continuous scale and limit optical misinterpretation due to the influence of background activity [3, 4]. This quantitative method is being applied in the current EuroNet-PHL-C2 clinical trial, in which adapted therapy is based on quantitative FDG avidity of tumor masses on PET evaluation after 2 cycles of OEPA [5, 6]. This approach, however, postpones risk stratification at interim evaluation; therefore, the definition of imaging baseline predictors is highly desirable.

The implementation metabolic tumor volume, as a sum of areas with an increased SUV inside the tumor, as well as the characterization of the heterogeneity of tumor metabolic patterns on FDG PET has become an emerging topic in nuclear medicine [7]. Several studies [8-11] have shown that the addition of volumetric and textural parameters can be a valuable help for disease prognostication and biological characterization of many tumor types, thus suggesting a similar implication for pediatric Hodgkin lymphoma [12]. On the other hand, the scientific background and the results obtained from our previous studies in the context of the Italian AIEOP-LH2004 trial [13, 14] suggest an additional impact of FDG PET in patients with or without bulky disease presenting with residual masses on morphological evaluation with computed tomography (CT).

Given the abovementioned premises, the AIEOP Hodgkin Lymphoma Study Group has planned to perform in the Italian cohort of patients treated according to the EuroNet-PHL-C2 trial additional volumetric analyses to improve the evaluation of tumor burden computed at baseline FDG PET and to identify prognostic factors suitable for predicting early metabolic response to therapy in pediatric Hodgkin lymphoma (HL). In case of bulky disease, further textural and shape analysis in the baseline FDG PET will be performed to evaluate macroscopic and microscopic heterogeneity of tumor masses, as reflection of their aggressiveness and different sensibility to chemotherapy.

## STUDY OBJECTIVES

This is a prospective observational multicentric cohort study. The primary objective of the study is to compare the diagnostic and prognostic role of volumetric assessment in HL patients at baseline and during the course of therapy with standard visual (Deauville score) and semi-quantitative (i.e. SUV<sub>max</sub>, SUV<sub>mean</sub>, SUV<sub>peak</sub>) analyses.

1  
2  
3 The secondary objective of the study is to identify the diagnostic and prognostic impact of texture  
4 analyses and the other metabolic parameters on bulky masses.

5  
6 The tertiary objective of the study is to determine the additional predictive and prognostic value of  
7 multiparametric assessment (i.e. SUVmax, SUVmean, SUVpeak, MTV, TLG and texture analysis)  
8 in HL patients having a partial response on morphological imaging.  
9  
10  
11  
12

### 13 **ELIGIBILITY CRITERIA**

14  
15 In accordance to the EuroNet-PHL-C2 trial, the population of our study will include pediatric  
16 patients <18 years of age, with histologically confirmed primary diagnosis of classical Hodgkin's  
17 lymphoma, who will undergo FDG PET at baseline (PET1), after two cycles of two cycles of  
18 induction OEPA therapy (PET2), and after the end of chemotherapy (PET3), in case of PET2  
19 positive patients [15]. Patients will be stratified at baseline in one of the three Treatment Levels  
20 (TL) on basis of stage and risk factors, confirmed by central review: TL-1, TL-2, TL-3 for low,  
21 intermediate and advanced HL, respectively [6, 15].  
22  
23  
24  
25  
26  
27  
28

### 29 **METHODOLOGY**

#### 30 **Whole body assessment of HL**

31  
32 All FDG PET scans performed in the Italian cohort of patients undergoing the EuroNet-PHL-C2  
33 trail will be analyzed with additional volumetric assessment comprising metabolic tumor volume  
34 (MTV) and total lesion glycolysis (TLG) at baseline and during the course of therapy.  
35  
36

37 In each patient, HL lesions will be identified by visual analysis and corresponding SUVmax,  
38 SUVmean and SUVpeak [16] will be determined as the pixel with the highest value of uptake, the  
39 mean value of uptake and the average value of uptake in a VOI (volume of interest) of 1ml that  
40 surrounds the voxel with the highest activity, respectively. A dedicated software will be used to  
41 delineate, semi-automatically, contours of the lesions using different threshold methods and the  
42 impact of segmentation technique will be evaluated (Figure 1). More specifically, four threshold  
43 methods will be used based on previously reported methodologies [17-20]:  
44  
45  
46  
47  
48

- 49 • Fixed 41% threshold of the SUVmax within the respective lymphoma site,
- 50 • Fixed absolute SUV threshold of 2.5;
- 51 • SUVmax(lesion)/SUVmean liver >1.5
- 52 • Adaptative method:  $I(\text{threshold}) = [0.15 \times I(\text{mean})] + I(\text{background})$ .  $I(\text{mean})$  is calculated as the  
53 mean intensity of all pixels surrounded by the 70%  $I_{\text{max}}$  isocontour within the tumor;  
54  $I(\text{background})$  is defined as a SUVmean of liver [21].  
55  
56  
57  
58  
59  
60



1  
2  
3 After delineation of all individual lesions, patient MTV will be estimated as the sum of voxels with  
4 supra-threshold uptake, reported in ml, and TLG will be calculated as [MTV x SUVmean].

5  
6 PET2 scans will be evaluated by visual analysis on the basis of Deauville-5-points-scale assigning  
7  
8 Inadequate Response (IR) when at least one site shows FDG uptake higher than liver uptake (scores  
9  
10 4 and 5). Additionally, the variation of SUVmax, determined as the percentage reduction between  
11  
12 the SUVmax in the tumor site with the most intense uptake on PET1 and the SUVmax in the tumor  
13  
14 site with the most intense uptake on PET2 ( $\Delta$ SUVmax) [9], will be computed. Similarly, will be  
15  
16 calculated the variation of SUVmean, SUVpeak, MTV, and TLG, respectively.

### 17 18 **Assessment of bulky masses**

19  
20 The definition of bulky masses will be determined as specified in EuroNet-PHL-C2 [15]. More  
21  
22 specifically, a volume of a contiguous lymph node mass  $\geq$  200ml, measured by the three largest  
23  
24 diameters on CT/MRI, will be considered as bulky. All bulky masses will be outlined using  
25  
26 different threshold methods, as explained above, and analyzed on dedicated software for semi-  
27  
28 quantitative and volumetric parameters. The same software will provide textural and shape features.  
29  
30 SUVmax will be defined as the maximum uptake in the segmented tumor. SUVmean will be  
31  
32 measured as the average uptake in the tumor burden. SUVpeak will be computed as the average  
33  
34 SUV in a 1ml region of tumor burden around the maximal SUV voxel. MTV will be the volume of  
35  
36 the segmented tumor. TLG will be calculated as the product of SUVmean by MTV.

37  
38 Among shape parameters, asphericity, convexity and 3D fractal dimensions will be computed [15,  
39  
40 **18, 22, 23**]. For the characterization of tumor texture, two methods will be used as previously  
41  
42 reported [11, 24, 25]: analysis of the histogram of the voxel values within the tumor and the method  
43  
44 accounting for the spatial arrangement of voxel values. By histogram-based method, on first-order  
45  
46 statistics, will be computed SD (standard deviation), Entropy, Energy, kurtosis and Skewness. To  
47  
48 define the spatial arrangement of the voxel values within the tumor, four matrices will be computed  
49  
50 from each VOI: gray-level co-occurrence matrix (GLCM), neighborhood gray-level different matrix  
51  
52 (NGLDM), gray-level zone length matrix (GLZLM) and gray-level run length matrix (GLRLM).

### 53 54 **Definition of morphological response**

55  
56 In pediatric HL patients presenting with morphological partial response on bulky masses and/or  
57  
58 residual lymph nodes with largest diameter  $\geq$  2 cm, a multiparametric assessment (i.e. SUVmax,  
59  
60 SUVmean, SUVpeak, MTV, TLG and texture analysis) will be performed. For this purpose, the  
International Working Group consensus response evaluation criteria in lymphoma (RECIL 2017)  
will be used when necessary [26]. In particular, we will include in the analysis all cases with:

- Poor bulk response: < 50% volume reduction and/or at least one nodal site with largest diameter of  $\geq 2$  cm and non-assessable qPET-value due to brown fatty tissue [15].
- Partial Response:  $\geq 30\%$  decrease in the sum of longest diameters of target lesions but no complete response; positive PET (DS 4–5); any bone marrow involvement, no new lesions [26].
- Minor Response:  $\geq 10\%$  decrease in the sum of longest diameters of target lesions but not a partial response [26].

### Sample size calculation

Given the limited number of robust data for volumetric and texture analysis in pediatric HL population, we considered adequate a sample size comprising all eligible patients. In the current study, we aspect to enroll minimum 50-80 patients per year from the Italian Hodgkin Lymphoma Group out for the different AIEOP Italian Centers. Based on the data derived from the previous AIEOP-LH2004 trial, the estimated number of bulky masses is quoted around 50% of the enrolled cases. Consequently, the overall cohort to be included in the study is expected of round 400-500 patients, with half presenting with bulky masses, eligible for dedicated analyses.

### PATIENT AND PUBLIC INVOLVEMENT

No patient involved

### STATISTICAL ANALYSIS

Descriptive statistics will be performed using conventional metrics (mean, median, range). All metabolic and heterogeneity parameters will be correlated with each other and with the disease outcome and their diagnostic and prognostic role will be investigated. For continuous data, differences between groups will be compared by the T test or the Wilcoxon test, when appropriate. For rank correlation, we will use Spearman' correlation coefficient ( $\rho$ ). The different threshold methods used to outline all individual lesions will be compared by the Pearson correlation coefficient, linear regression, Bland-Altman and logistic regression. Optimal cut-off values of the metabolic parameters and, in patients with bulky mass, also of textural parameters for distinguishing inadequate response (IR) from adequate response (AR) to therapy will be defined by receiver operating characteristic (ROC) curves with respective areas under the curve (AUC). Patients with or without bulky mass will be divided into groups of complete metabolic response (CMR), partial metabolic response (PMR), no metabolic response (NMR) and progressive metabolic disease (PMD) and differences in metabolic and textural parameters will be investigated

1  
2  
3 by analysis of variance (ANOVA). Linear regression will be applied to determine the relationship  
4 between response and all other variables. Statistical significance will be set for  $p < 0.05$ .  
5  
6  
7

## 8 **DISCUSSION**

9  
10 In literature there is evidence that metabolically active tumor volume determined by PET/CT is  
11 more advantageous than tumor volume measured by CT or MRI for predicting response to  
12 treatment in various malignancies afflicting both adult and the pediatric population. More  
13 specifically, in adult population, recent publications have demonstrated that the measurement of 3-  
14 dimensional disease volume (MTV) and metabolic activity (TLG) [27] can help predict outcomes in  
15 HL patients [8, 9, 27-29]. This might suggest a similar implication also in pediatric HL, where the  
16 tumor volume may not change because of overlapping inflammatory processes correlated to  
17 therapy, while early changes of metabolic activity are most frequently reported.  
18  
19

20 Along with the above mentioned semi-quantitative parameters, it is possible to extract other  
21 quantitative features from PET-CT images, including intensity, heterogeneity, and shape within the  
22 tumor, potentially reflecting underlying biological characteristics [27]. These characteristics are  
23 embedded in the so called “Radiomics”, a translational field of research aiming to extract high-  
24 dimensional data from clinical images to predict underlying biological characteristics of the disease  
25 [30]. Radiomic features are correlated to prognostic markers in cancer (i.e. hypoxia, angiogenesis,  
26 proliferation, etc.) and might be utilized for tumor response prediction and outcome  
27 prognostication. In pediatric population, especially in case of advanced stage disease, high dose  
28 therapeutic regimens represent the standard to guarantee cure, yet at the expense of early and  
29 delayed side effects [31]. In this context, it becomes even more important to identify those factors  
30 capable of limiting the doses to the necessary therapeutic effect while reducing at maximum the  
31 undesirable consequences. These prerogatives have guided in the last decades clinical research in  
32 adult [32, 33] and pediatric HL [6, 15].  
33  
34  
35  
36  
37  
38  
39  
40  
41  
42  
43  
44  
45

46 In the present study, we aim to identify prospectively the role of volumetric and texture (radiomic)  
47 characteristics better fulfilling the need for predictive and prognostic factors in pediatric HL.  
48 Thanks to a large sample size and to a preliminary methodological validation, we expect to obtain  
49 significant data on the added value of volumetric and texture analysis on FDG PET assessment in  
50 pediatric Hodgkin Lymphoma.  
51  
52  
53  
54  
55  
56  
57  
58  
59  
60

## STRENGTHS AND LIMITATIONS OF THE STUDY

- This study will represent the largest analysis on volumetric and semi-quantitative parameters in pediatric HL undergoing a therapeutic trial.
- The dedicated evaluation of texture features in HL bulky masses, will allow for a solid definition of the impact of radiomics in this large pediatric population.
- Thanks to a comparative disease evaluation with both metabolic (PET) and morphological (CT/MRI) parameters, we will be able to assess the added value of the technique in HL patients presenting with a partial response to therapy.
- Since all study examinations are centrally reviewed after online platform upload of DICOM images, the only limitation of the study is related to the retrieval of all uploaded scans.

1  
2  
3  
4  
5  
6  
7  
8  
9  
10  
11  
12  
13  
14  
15  
16  
17  
18  
19  
20  
21  
22  
23  
24  
25  
26  
27  
28  
29  
30  
31  
32  
33  
34  
35  
36  
37  
38  
39  
40  
41  
42  
43  
44  
45  
46  
47  
48  
49  
50  
51  
52  
53  
54  
55  
56  
57  
58  
59  
60

### **LIST OF ABBREVIATIONS**

AIEOP = Associazione Italiana di Ematologia e Oncologia Pediatrica

CT = computed tomography

DS = Deauville score

FDG = 18F-fluorodeoxyglucose

GLCM = gray-level co-occurrence matrix

GLRLM = gray-level run length matrix

GLZLM = gray-level zone length matrix

HL = Hodgkin lymphoma

MRI = magnetic resonance imaging

MTV = metabolic tumor volume

NGLDM = neighborhood gray-level different matrix

OEPA = Vincristine Sulfate (Oncovin), Etoposide Phosphate, Prednisone. Doxorubicin Hydrochloride (Adriamycin)

PET = positron emission tomography

SD = standard deviation

SUV = standardized uptake value

TLG = total lesion glycolysis

VOI = volume of interest

## DECLARATIONS

## ETHICS APPROVAL AND CONSENT TO PARTICIPATE

The current study has been approved by AIFA (Agenzia Italiana del Farmaco) the 9<sup>th</sup> of March 2018 (EudraCT 2012-004053-88, EM-04; AIFA/SC/P/27087 approved 09/03/2018). All procedures involving human participants will be performed in accordance with the ethical standards of the institutional and/or national research committee and with the principles of the 1964 Declaration of Helsinki and its later amendments or comparable ethical standards. All patients will sign a written informed consent to participate in the study.

## CONSENT FOR PUBLICATION

Not applicable

## AVAILABILITY OF DATA AND MATERIAL

Not applicable

## COMPETING INTERESTS

The author(s) declare that they have no competing interests.

## AUTHORS' CONTRIBUTION

EL, CE, RB and MM planned, coordinated and conducted the study. Medical care is covered by the AIEOP Centers for the Hodgkin Lymphoma Study Group. Scientific program is planned by MM, EL, RB. All authors read and approved the final manuscript.

## FUNDING

Fondazione Umberto Veronesi has provided support to the study with three fellowship grants. AGMEN (Associazione Genitori Malati Emato-Oncologici) is supporting the study by covering the expenses for the central revision platform of the trial.

## ACKNOWLEDGEMENTS

AIEOP (Associazione Italiana Ematologia Oncologia Pediatrica) Hodgkin Lymphoma Study Group. The authors would like to thank E. Maziotti for the support in the study analyses.

**REFERENCES**

1. Cheson, B.D., et al. Recommendations for Initial Evaluation, Staging, and Response Assessment of Hodgkin and Non-Hodgkin Lymphoma: The Lugano Classification. *J Clin Oncol.* 2014, Vol. 32, 27, p. 3059-67.
2. Barrington, S.F., et al. Role of Imaging in the Staging and Response Assessment of Lymphoma: Consensus of International Conference on Malignant Lymphomas Imaging Working Group. *J Clin Oncol.* 2014, Vol. 32, 27, p. 3048-58.
3. Barrington, S.F., et al. FDG PET for therapy monitoring in Hodgkin and non-Hodgkin lymphoma. *Eur J Nucl Med Mol Imaging.* 2017, Vol. 44, p. 97-110.
4. Hasenclever D., et al. qPET – a quantitative extension of the Deauville scale to assess response in interim FDG-PET scans in lymphoma. *Eur J Nucl Med Mol Imaging.* 2014, Vol. 41, p. 1301-8.
5. Mauz-Körholz C., et al. Procarbazine-free OEPA-COPDAC chemotherapy in boys and standard OPPA-COPP in girls have comparable effectiveness in pediatric Hodgkin's lymphoma: the GPOH-HD-2002 study. *J Clin Oncol.* 2016, Vol. 28, 23, p. 3680-6.
6. Rogasch JMM, et al. Pretherapeutic FDG-PET total metabolic tumor volume predicts response to induction therapy in pediatric Hodgkin's lymphoma. *BMC Cancer.* 2018; Vol. 18: p.521
7. Kostakoglu, L., et al. FDG-PET imaging for Hodgkin Lymphoma: Current use and future applications. *Clin Adv Hematol Oncol.* 2014, Vol. 12, p. 20-35.
8. Meignan, M., et al. Metabolic tumor volumes measured at staging in lymphoma: Methodological evaluation on phantom experiments and patients. *Eur J Nucl Med Mol Imaging.* 2014, Vol. 41, p. 1113-1122.
9. Kanoun, S., et al. Baseline metabolic tumor volume is an independent prognostic factor in Hodgkin lymphoma. *Nucl Med Mol Imaging.* 2014, Vol. 41, p. 1735-1743.
10. Brooks, F.J., et al. Low-order non-spatial effects dominate second-order spatial effects in the texture quantifier analysis of 18F-FDG-PET images. *PLoS One.* 2015, Vol. 10, p. e0116574.
11. Buvat, I., et al. Tumor texture analysis in PET: Where do we stand? *J Nucl Med.* 2015, Vol. 56, p. 1642-44.
12. Kluge, R., et al. Current Role of FDG-PET in Pediatric Hodgkin's Lymphoma. *Semin Nucl Med.* 2017, Vol. 47, p. 242-257.



- 1  
2  
3 13. Lopci, E., et al. Postchemotherapy PET evaluation correlates with patient outcome in paediatric  
4 Hodgkin's disease. *Eur J Nucl Med Mol Imaging*. 2011, Vol. 38, 9, p. 1620-7.  
5  
6
- 7  
8 14. Lopci, E., et al. Additional role of FDG-PET in paediatric HD patients presenting with a partial  
9 response on CT: data deriving from a multicentric Italian study. *Eur J Nucl Med Mol Imaging*.  
10 2012, Vol. 39, p. S155–S303.  
11  
12
- 13 15 . Second International Inter-Group Study for Classical Hodgkin Lymphoma in Children and  
14 Adolescents. Final protocol version, 1st amendment.  
15 <https://clinicaltrials.gov/ct2/show/NCT02684708>.  
16  
17
- 18  
19 16. Vanderhoek, M., et al. Impact of the Definition of Peak Standardized Uptake Value on  
20 Quantification of Treatment Response. *J Nucl Med*. 2012, Vol. 53, p. 4-11.  
21  
22
- 23  
24 17. Boellaard, R., et al. FDG PET and PET/CT: EANM procedure guidelines for tumourPET  
25 imaging: version 1.0. *Eur J Nucl Med Mol Imaging*. 2010, Vol. 37, p. 181-200.  
26  
27
- 28 18. Ben Bouallègue, F., et al. Association between textural and morphological tumor indices on  
29 baseline PET-CT and early metabolic response on interim PET-CT in bulky malignant  
30 lymphomas. *Med Phys*. 2017, Vol. 44, p. 4608-19.  
31  
32
- 33  
34 19. Mettler, J., et al. Metabolic Tumour Volume for Response Prediction in Advanced-Stage  
35 Hodgkin Lymphoma. *J Nucl Med*. 2018.  
36  
37
- 38 20. Cottreau, A.S., et al. Prognostic value of baseline metabolic tumor volume in early-stage  
39 Hodgkin lymphoma in the standard arm of the H10 trial. *Blood*. 2018, Vol. 131, p. 1456-63.  
40  
41
- 42  
43 21. Nestle U., et al. Comparison of different methods for delineation of 18F-FDG PET-positive  
44 tissue for target volume definition in radiotherapy of patients with non-Small cell lung cancer. *J*  
45 *Nucl Med*. 2005; Vol. 46: p.1342-8.  
46  
47
- 48  
49 22. Castello, A., et al. Prognostic Impact of Intratumoral Heterogeneity Based on Fractal Geometry  
50 Analysis in Operated NSCLC Patients. *Mol Imaging Biol*. 2018.  
51  
52
- 53 23. Grizzi, F., et al. The Complexity and Fractal Geometry of Nuclear Medicine Images. *Mol*  
54 *Imaging Biol*. 2018.  
55  
56
- 57 24. Orlhac, F., et al. Tumor Texture Analysis in 18F-FDG PET: Relationships Between Texture  
58 Parameters, Histogram Indices, Standardized Uptake Values, Metabolic Volumes, and Total  
59 Lesion Glycolysis. *J Nucl Med*. 2014, Vol. 55, p. 414-422.  
60



- 1  
2  
3 25. Ganeshan, B., et al. CT-based texture analysis potentially provides prognostic information  
4 complementary to interim fdg-pet for patients with hodgkin's and aggressive non-hodgkin's  
5 lymphomas. *Eur Radiol.* 2017, Vol. 27, p. 1012-1020.  
6  
7
- 8  
9 26. Younes A. et al, International Working Group consensus response evaluation criteria in  
10 lymphoma (RECIL 2017). *Ann Oncol.* 2017;Vol. 28: P. 1436-1447.  
11  
12
- 13 27. Milgrom et al., A PET radiomics model to predict refractory mediastinal Hodgkin Lymphoma.  
14 *Sci Rep* 2019; Vol. 9; p. 1322.  
15  
16
- 17 28. Song MK. et al., Metabolic tumor volume by positron emission tomography/computed  
18 tomography as a clinical parameter to determine therapeutic modality for early stage Hodgkin's  
19 lymphoma. *Cancer Sci* 2013; Vol. 104: p. 1656-61.  
20  
21  
22
- 23 29. Akhtari M., et al. Reclassifying patients with early-stage Hodgkin lymphoma based on  
24 functional radiographic markers at presentation. *Blood.* 2018; Vol. 131: p. 84-94.  
25  
26  
27
- 28 30. Rizzo S, et al. Radiomics: the facts and the challenges of image analysis. *Eur Radiol Exp*  
29 2018;2:36.  
30  
31
- 32 31. Lackner H., et al, Prospectiveevaluation of late effects after childhood cancer therapy with  
33 follow-up over 9 years. *Eur J Pediatr* 2000; Vol. 159: p. 750-758.  
34  
35
- 36 32. Borchmann P, et al. PET-guided treatment in patients with advanced-stage Hodgkin's  
37 lymphoma (HD18): final results of an open-label, international, randomised phase 3 trial by the  
38 German Hodgkin study group. *Lancet.* 2018;Vol. 390: p. 2790–802.  
39  
40  
41
- 42 33. Casasnovas RO, et al. PET-adapted treatment for newly diagnosed advanced Hodgkin  
43 lymphoma (AHL2011): a randomised, multicentre, non-inferiority, phase 3 study. *Lancet*  
44 *Oncol* 2019; Vol. 20: p. 202-215.  
45  
46  
47  
48  
49  
50  
51  
52  
53  
54  
55  
56  
57  
58  
59  
60

## FIGURE LEGEND

**Figure 1:** Comparative representation of the four segmentation techniques applied in our study protocol illustrated from left to right: fixed 41% threshold (V41%); fixed absolute SUV threshold of 2.5 (V2.5); SUVmax(lesion)/SUVmean liver >1.5 (Vliver); and adaptative method (AM). The same HL patient has been analyzed according to the above mentioned techniques and corresponding TMTV (total metabolic tumor volumes) at baseline have been displayed for comparison.

For peer review only

1  
2  
3  
4  
5  
6  
7  
8  
9  
10  
11  
12  
13  
14  
15  
16  
17  
18  
19  
20  
21  
22  
23  
24  
25  
26  
27  
28  
29  
30  
31  
32  
33  
34  
35  
36  
37  
38  
39  
40  
41  
42  
43  
44

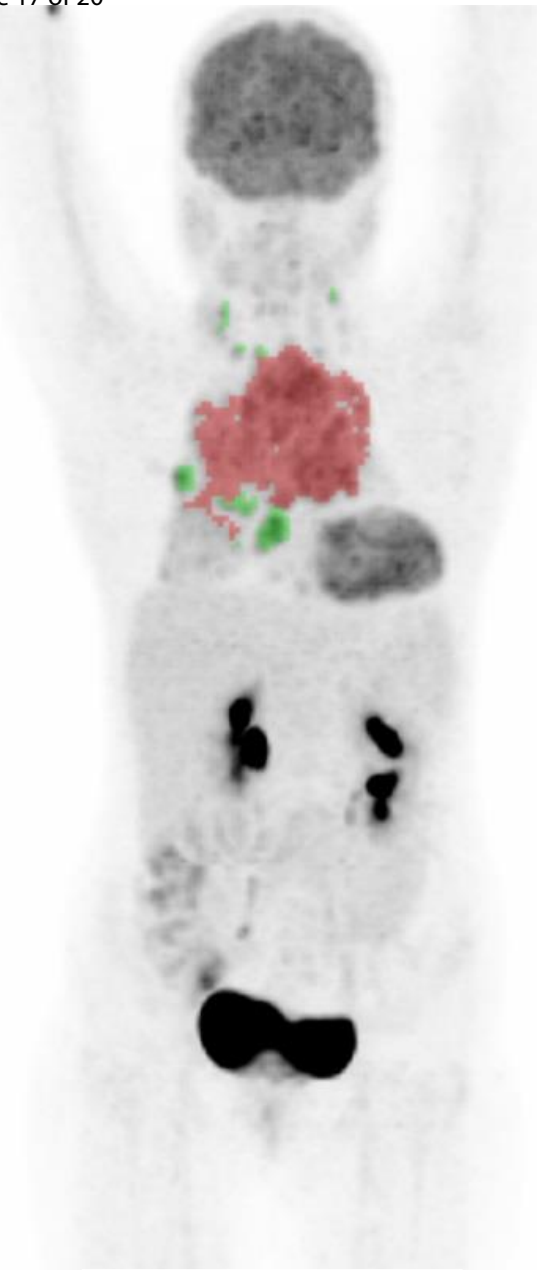

TMTV (V41%) Baseline  
242,30

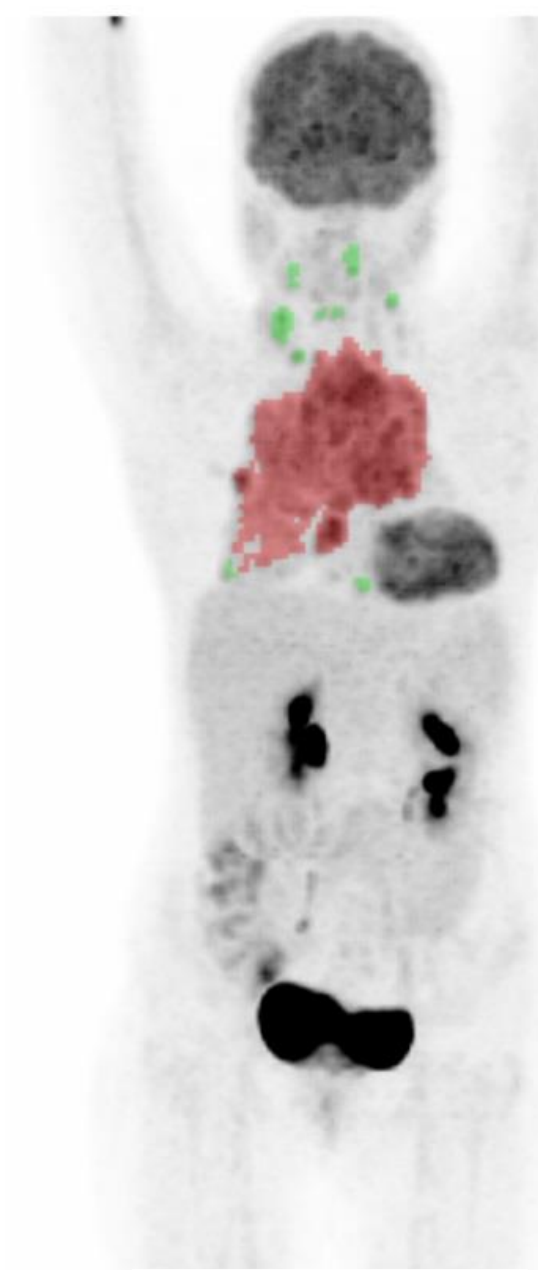

TMTV (V2.5) Baseline  
471,00

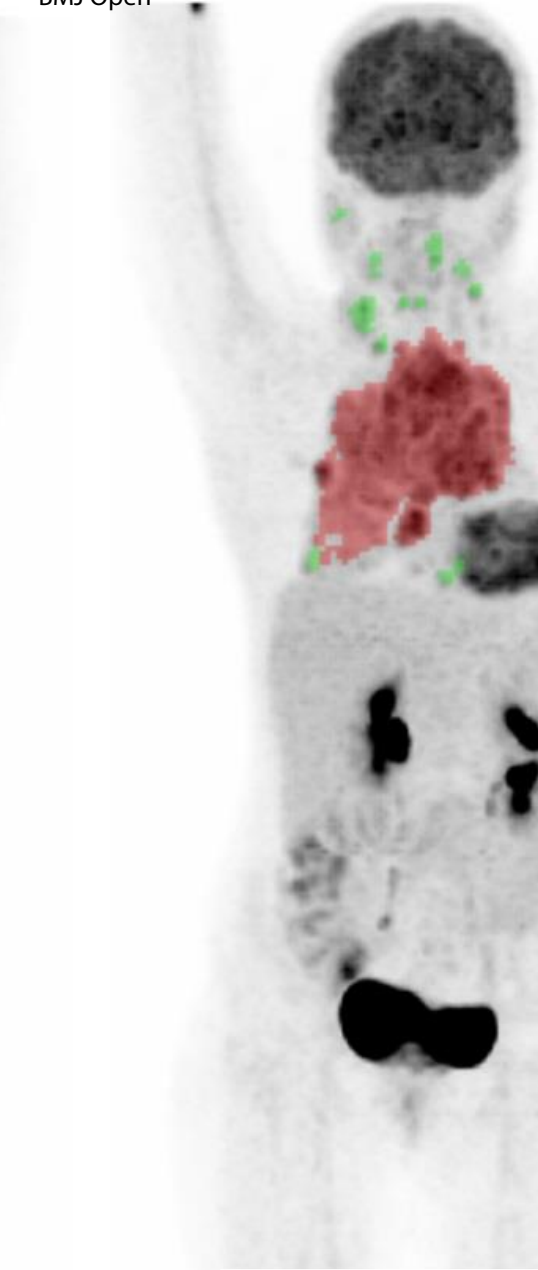

TMTV (Vliver) Baseline  
500,40

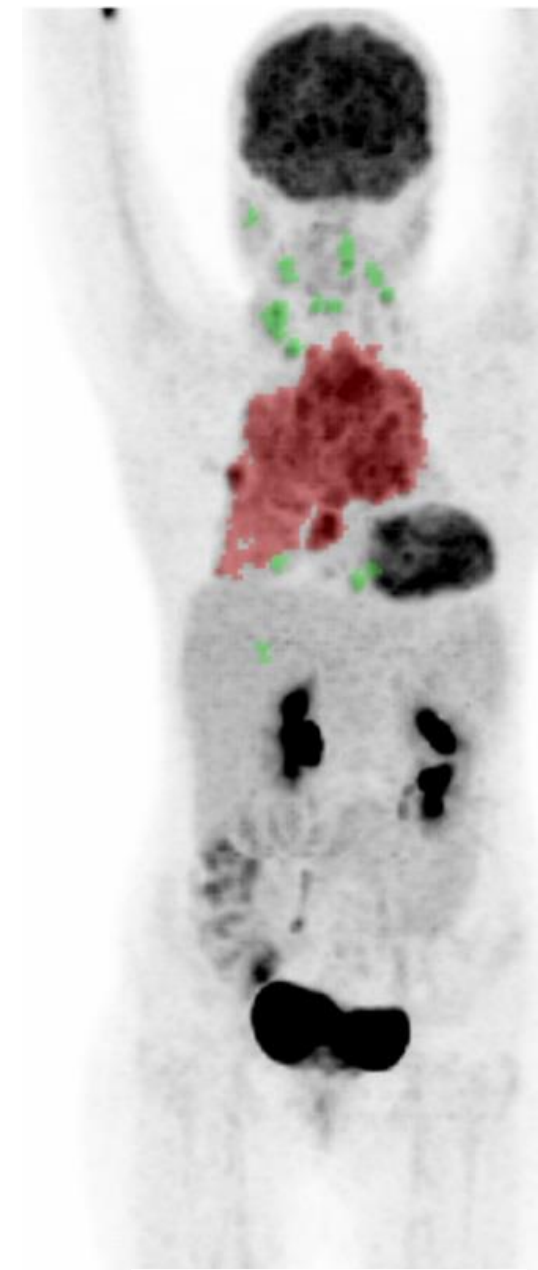

TMTV (AM) Baseline  
538,3

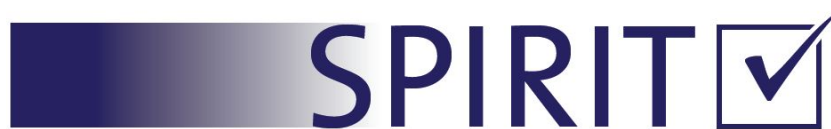

STANDARD PROTOCOL ITEMS: RECOMMENDATIONS FOR INTERVENTIONAL TRIALS

SPIRIT 2013 Checklist: Recommended items to address in a clinical trial protocol and related documents\*

| Section/item                      | Item No | Description                                                                                                                                                                                                                                                                                                                                                                                                                                                                                                                                                                                                                                                                                                                                                                                                                                      |
|-----------------------------------|---------|--------------------------------------------------------------------------------------------------------------------------------------------------------------------------------------------------------------------------------------------------------------------------------------------------------------------------------------------------------------------------------------------------------------------------------------------------------------------------------------------------------------------------------------------------------------------------------------------------------------------------------------------------------------------------------------------------------------------------------------------------------------------------------------------------------------------------------------------------|
| <b>Administrative information</b> |         |                                                                                                                                                                                                                                                                                                                                                                                                                                                                                                                                                                                                                                                                                                                                                                                                                                                  |
| Title                             | 1       | Additional value of volumetric and texture analysis on FDG PET assessment in pediatric Hodgkin Lymphoma in the context of the euronet-PHL-C2-Trial.                                                                                                                                                                                                                                                                                                                                                                                                                                                                                                                                                                                                                                                                                              |
| Trial registration                | 2a      | EudraCT 2012-004053-88, EM-04;                                                                                                                                                                                                                                                                                                                                                                                                                                                                                                                                                                                                                                                                                                                                                                                                                   |
|                                   | 2b      | AIFA/SC/P/27087 approved 9th of March 2018                                                                                                                                                                                                                                                                                                                                                                                                                                                                                                                                                                                                                                                                                                                                                                                                       |
| Protocol version                  | 3       | Amendment Nr. 04 to the protocol 4.0 final version 2017-07-31                                                                                                                                                                                                                                                                                                                                                                                                                                                                                                                                                                                                                                                                                                                                                                                    |
| Funding                           | 4       | Declarations, article page 10                                                                                                                                                                                                                                                                                                                                                                                                                                                                                                                                                                                                                                                                                                                                                                                                                    |
| Roles and responsibilities        | 5a      | Responsible investigators:<br>Egest Lopci, MD, PhD, Nuclear Medicine department, Humanitas Clinical and Research Hospital – IRCCS, Rozzano (MI), Italy<br>Maurizio Mascarin, MD, AYA and Pediatric Radiotherapy IRCCS Centro di Riferimento Oncologico<br>Roberta Burnelli, MD, Pediatric Onco-hematologic Unit, University Hospital S. Anna, Ferrara<br>Caterina Elia, AYA and Pediatric Radiotherapy, IRCCS Centro di Riferimento Oncologico<br>Arnoldo Piccardo, MD, Nuclear Medicine department, Galliera Hospital, Genoa, Italy.<br>Eugenio Borsatti, MD, Nuclear Medicine department, Centro di Riferimento Oncologico, Aviano, Pordenone, Italy<br>Pietro Zucchetta, MD, Nuclear Medicine Department, University Hospital, Padova, Italy<br>Angelina Cistaro, MD, Positron Emission Tomography Centre, IRMET S.p.A. Affidea, Turin, Italy |
|                                   | 5b      | Maurizio Mascarin, MD, AYA and Pediatric Radiotherapy IRCCS Centro di Riferimento Oncologico                                                                                                                                                                                                                                                                                                                                                                                                                                                                                                                                                                                                                                                                                                                                                     |
|                                   | 5c      | As per EuroNet-PHL-C2 amendment Nr. 04 to the protocol 4.0 final version 2017-07-31 and AIEOP Hodgkin Lymphoma Study Group                                                                                                                                                                                                                                                                                                                                                                                                                                                                                                                                                                                                                                                                                                                       |
|                                   | 5d      | As per EuroNet-PHL-C2 amendment Nr. 04 to the protocol 4.0 final version 2017-07-31 and AIEOP Hodgkin Lymphoma Study Group                                                                                                                                                                                                                                                                                                                                                                                                                                                                                                                                                                                                                                                                                                                       |
|                                   |         |                                                                                                                                                                                                                                                                                                                                                                                                                                                                                                                                                                                                                                                                                                                                                                                                                                                  |

**Introduction**

|    |                |    |                                                                |
|----|----------------|----|----------------------------------------------------------------|
| 1  |                |    |                                                                |
| 2  | Background and | 6a | Background, article page 4                                     |
| 3  | rationale      |    |                                                                |
| 4  |                |    |                                                                |
| 5  |                | 6b | Background, article page 4                                     |
| 6  |                |    |                                                                |
| 7  | Objectives     | 7  | Study objectives, article page 4                               |
| 8  |                |    |                                                                |
| 9  | Trial design   | 8  | This is a prospective observational multicentric cohort study. |
| 10 |                |    |                                                                |
| 11 |                |    |                                                                |
| 12 |                |    |                                                                |
| 13 |                |    |                                                                |
| 14 |                |    |                                                                |

### Methods: Participants, interventions, and outcomes

|    |                      |     |                                                                                     |
|----|----------------------|-----|-------------------------------------------------------------------------------------|
| 15 |                      |     |                                                                                     |
| 16 |                      |     |                                                                                     |
| 17 | Study setting        | 9   | As per EuroNet-PHL-C2 amendment Nr. 04 to the protocol 4.0 final version 2017-07-31 |
| 18 |                      |     |                                                                                     |
| 19 |                      |     |                                                                                     |
| 20 | Eligibility criteria | 10  | Eligibility criteria, article page 5                                                |
| 21 |                      |     |                                                                                     |
| 22 | Interventions        | 11a | N/A                                                                                 |
| 23 |                      |     |                                                                                     |
| 24 |                      | 11b | As per EuroNet-PHL-C2 amendment Nr. 04 to the protocol 4.0 final version 2017-07-31 |
| 25 |                      |     |                                                                                     |
| 26 |                      | 11c | As per EuroNet-PHL-C2 amendment Nr. 04 to the protocol 4.0 final version 2017-07-31 |
| 27 |                      |     |                                                                                     |
| 28 |                      | 11d | As per EuroNet-PHL-C2 amendment Nr. 04 to the protocol 4.0 final version 2017-07-31 |
| 29 |                      |     |                                                                                     |
| 30 |                      |     |                                                                                     |
| 31 |                      |     |                                                                                     |
| 32 |                      |     |                                                                                     |
| 33 | Outcomes             | 12  | Study objectives, article page                                                      |
| 34 |                      |     |                                                                                     |
| 35 | Participant          | 13  | As per EuroNet-PHL-C2 amendment Nr. 04 to the protocol 4.0 final version 2017-07-31 |
| 36 | timeline             |     |                                                                                     |
| 37 |                      |     |                                                                                     |
| 38 |                      |     |                                                                                     |
| 39 | Sample size          | 14  | Sample size calculation, article page 7                                             |
| 40 |                      |     |                                                                                     |
| 41 | Recruitment          | 15  | AIEOP Hodgkin Lymphoma Study Group                                                  |
| 42 |                      |     |                                                                                     |

### Methods: Assignment of interventions (for controlled trials)

#### Allocation:

|    |                |     |                                                                                     |
|----|----------------|-----|-------------------------------------------------------------------------------------|
| 43 |                |     |                                                                                     |
| 44 |                |     |                                                                                     |
| 45 |                |     |                                                                                     |
| 46 |                |     |                                                                                     |
| 47 | Sequence       | 16a | As per EuroNet-PHL-C2 amendment Nr. 04 to the protocol 4.0 final version 2017-07-31 |
| 48 | generation     |     |                                                                                     |
| 49 |                |     |                                                                                     |
| 50 | Allocation     | 16b | As per EuroNet-PHL-C2 amendment Nr. 04 to the protocol 4.0 final version 2017-07-31 |
| 51 | concealment    |     |                                                                                     |
| 52 | mechanism      |     |                                                                                     |
| 53 |                |     |                                                                                     |
| 54 | Implementation | 16c | As per EuroNet-PHL-C2 amendment Nr. 04 to the protocol 4.0 final version 2017-07-31 |
| 55 |                |     |                                                                                     |
| 56 |                |     |                                                                                     |
| 57 |                |     |                                                                                     |
| 58 | Blinding       | 17a | Open label                                                                          |
| 59 | (masking)      |     |                                                                                     |
| 60 |                |     |                                                                                     |

1  
2  
3  
4  
5  
6  
7  
8  
9  
10  
11  
12  
13  
14  
15  
16  
17  
18  
19  
20  
21  
22  
23  
24  
25  
26  
27  
28  
29  
30  
31  
32  
33  
34  
35  
36  
37  
38  
39  
40  
41  
42  
43  
44  
45  
46  
47  
48  
49  
50  
51  
52  
53  
54  
55  
56  
57  
58  
59  
60

17b N/A

### Methods: Data collection, management, and analysis

|                         |     |                                                                                                                             |
|-------------------------|-----|-----------------------------------------------------------------------------------------------------------------------------|
| Data collection methods | 18a | Statistical Analysis, article page 7                                                                                        |
|                         | 18b | As per EuroNet-PHL-C2 amendment Nr. 04 to the protocol 4.0 final version 2017-07-31 and AIEOP Hodgkin Lymphoma Study Group  |
| Data management         | 19  | As per EuroNet-PHL-C2 amendment Nr. 04 to the protocol 4.0 final version 2017-07-31 and AIEOP Hodgkin Lymphoma Study Group  |
| Statistical methods     | 20a | Statistical Analysis, article page 7                                                                                        |
|                         | 20b | Statistical Analysis, article page 7                                                                                        |
|                         | 20c | As per EuroNet-PHL-C2 amendment Nr. 04 to the protocol 4.0 final version 2017-07-31 and AIEOP Hodgkin Lymphoma Study Group) |

### Methods: Monitoring

|                 |     |                                                                                                                            |
|-----------------|-----|----------------------------------------------------------------------------------------------------------------------------|
| Data monitoring | 21a | As per EuroNet-PHL-C2 amendment Nr. 04 to the protocol 4.0 final version 2017-07-31 and AIEOP Hodgkin Lymphoma Study Group |
|                 | 21b | As per EuroNet-PHL-C2 amendment Nr. 04 to the protocol 4.0 final version 2017-07-31 and AIEOP Hodgkin Lymphoma Study Group |
| Harms           | 22  | As per EuroNet-PHL-C2 amendment Nr. 04 to the protocol 4.0 final version 2017-07-31 and AIEOP Hodgkin Lymphoma Study Group |
| Auditing        | 23  | As per EuroNet-PHL-C2 amendment Nr. 04 to the protocol 4.0 final version 2017-07-31 and AIEOP Hodgkin Lymphoma Study Group |

### Ethics and dissemination

|                          |     |                                                                                                              |
|--------------------------|-----|--------------------------------------------------------------------------------------------------------------|
| Research ethics approval | 24  | The protocol has been already board (REC/IRB) approved                                                       |
| Protocol amendments      | 25  | N/A                                                                                                          |
| Consent or assent        | 26a | Local investigators affiliated to the AIEOP (Associazione Italiana Ematologia Oncologia Pediatrica) centers. |
|                          | 26b | N/A                                                                                                          |
| Confidentiality          | 27  | As per EuroNet-PHL-C2 protocol and AIEOP policy                                                              |
| Declaration of interests | 28  | Declarations, article page 10                                                                                |
| Access to data           | 29  | As per EuroNet-PHL-C2 protocol and AIEOP policy                                                              |

|    |                 |     |                                                                         |
|----|-----------------|-----|-------------------------------------------------------------------------|
| 1  |                 |     |                                                                         |
| 2  | Ancillary and   | 30  | N/A                                                                     |
| 3  | post-trial care |     |                                                                         |
| 4  |                 |     |                                                                         |
| 5  | Dissemination   | 31a | Trial results will be communicated to participants, healthcare          |
| 6  | policy          |     | professionals, the public, and other relevant groups via scientific and |
| 7  |                 |     | congress publications.                                                  |
| 8  |                 |     |                                                                         |
| 9  |                 | 31b | Authorship eligibility will be provided to investigators based on their |
| 10 |                 |     | contribution to the study.                                              |
| 11 |                 |     |                                                                         |
| 12 |                 | 31c | As per EuroNet-PHL-C2 protocol and AIEOP policy                         |
| 13 |                 |     |                                                                         |
| 14 |                 |     |                                                                         |

## Appendices

|    |                  |    |                                                                  |
|----|------------------|----|------------------------------------------------------------------|
| 15 |                  |    |                                                                  |
| 16 |                  |    |                                                                  |
| 17 | Informed consent | 32 | As per EuroNet-PHL-C2 amendment Nr. 04 to the protocol 4.0 final |
| 18 | materials        |    | version 2017-07-31                                               |
| 19 |                  |    |                                                                  |
| 20 | Biological       | 33 | N/A                                                              |
| 21 | specimens        |    |                                                                  |
| 22 |                  |    |                                                                  |

---

\*It is strongly recommended that this checklist be read in conjunction with the SPIRIT 2013 Explanation & Elaboration for important clarification on the items. Amendments to the protocol should be tracked and dated. The SPIRIT checklist is copyrighted by the SPIRIT Group under the Creative Commons "[Attribution-NonCommercial-NoDerivs 3.0 Unported](https://creativecommons.org/licenses/by-nc-nd/3.0/)" license.

# BMJ Open

## Additional value of volumetric and texture analysis on FDG PET assessment in pediatric Hodgkin Lymphoma: methodology and potential clinical implications of an Italian multicentric trial.

|                                 |                                                                                                                                                                                                                                                                                                                                                                                                                                                                                                                                                                                                                                                                                                                                                                                                                        |
|---------------------------------|------------------------------------------------------------------------------------------------------------------------------------------------------------------------------------------------------------------------------------------------------------------------------------------------------------------------------------------------------------------------------------------------------------------------------------------------------------------------------------------------------------------------------------------------------------------------------------------------------------------------------------------------------------------------------------------------------------------------------------------------------------------------------------------------------------------------|
| Journal:                        | <i>BMJ Open</i>                                                                                                                                                                                                                                                                                                                                                                                                                                                                                                                                                                                                                                                                                                                                                                                                        |
| Manuscript ID                   | bmjopen-2020-041252.R1                                                                                                                                                                                                                                                                                                                                                                                                                                                                                                                                                                                                                                                                                                                                                                                                 |
| Article Type:                   | Protocol                                                                                                                                                                                                                                                                                                                                                                                                                                                                                                                                                                                                                                                                                                                                                                                                               |
| Date Submitted by the Author:   | 18-Nov-2020                                                                                                                                                                                                                                                                                                                                                                                                                                                                                                                                                                                                                                                                                                                                                                                                            |
| Complete List of Authors:       | Lopci, Egesta; Humanitas Research Hospital, Nuclear Medicine Department<br>Burnelli, Roberta; University Hospital Arcispedale Sant'Anna of Ferrara, Pediatric Onco-hematologic Unit<br>Elia, Caterina; Centro di Riferimento Oncologico, AYA Oncology and Pediatric Radiotherapy Unit<br>Piccardo, Arnoldo; Ente Ospedaliero Ospedali Galliera, Nuclear Medicine Department<br>Castello, Angelo; Humanitas Research Hospital, Nuclear Medicine Department<br>Borsatti, Eugenio; Centro di Riferimento Oncologico, Nuclear Medicine Department<br>Zucchetta, Pietro; Padua University Hospital, Nuclear Medicine Department<br>Cistaro, Angelina; Ente Ospedaliero Ospedali Galliera, Nuclear Medicine Department<br>Mascarin, Maurizio; Centro di Riferimento Oncologico, AYA Oncology and Pediatric Radiotherapy Unit |
| <b>Primary Subject Heading</b>: | Oncology                                                                                                                                                                                                                                                                                                                                                                                                                                                                                                                                                                                                                                                                                                                                                                                                               |
| Secondary Subject Heading:      | Paediatrics                                                                                                                                                                                                                                                                                                                                                                                                                                                                                                                                                                                                                                                                                                                                                                                                            |
| Keywords:                       | Lymphoma < HAEMATOLOGY, Nuclear radiology < RADIOLOGY & IMAGING, Protocols & guidelines < HEALTH SERVICES ADMINISTRATION & MANAGEMENT                                                                                                                                                                                                                                                                                                                                                                                                                                                                                                                                                                                                                                                                                  |
|                                 |                                                                                                                                                                                                                                                                                                                                                                                                                                                                                                                                                                                                                                                                                                                                                                                                                        |

SCHOLARONE™  
Manuscripts





I, the Submitting Author has the right to grant and does grant on behalf of all authors of the Work (as defined in the below author licence), an exclusive licence and/or a non-exclusive licence for contributions from authors who are: i) UK Crown employees; ii) where BMJ has agreed a CC-BY licence shall apply, and/or iii) in accordance with the terms applicable for US Federal Government officers or employees acting as part of their official duties; on a worldwide, perpetual, irrevocable, royalty-free basis to BMJ Publishing Group Ltd ("BMJ") its licensees and where the relevant Journal is co-owned by BMJ to the co-owners of the Journal, to publish the Work in this journal and any other BMJ products and to exploit all rights, as set out in our [licence](#).

The Submitting Author accepts and understands that any supply made under these terms is made by BMJ to the Submitting Author unless you are acting as an employee on behalf of your employer or a postgraduate student of an affiliated institution which is paying any applicable article publishing charge ("APC") for Open Access articles. Where the Submitting Author wishes to make the Work available on an Open Access basis (and intends to pay the relevant APC), the terms of reuse of such Open Access shall be governed by a Creative Commons licence – details of these licences and which [Creative Commons](#) licence will apply to this Work are set out in our licence referred to above.

Other than as permitted in any relevant BMJ Author's Self Archiving Policies, I confirm this Work has not been accepted for publication elsewhere, is not being considered for publication elsewhere and does not duplicate material already published. I confirm all authors consent to publication of this Work and authorise the granting of this licence.

1  
2  
3  
4  
5  
6  
7  
8  
9  
10  
11  
12



**Additional value of volumetric and texture analysis on FDG PET assessment in pediatric Hodgkin Lymphoma: methodology and potential clinical implications of an Italian multicentric trial.**

13 Egesta Lopci (1), Roberta Burnelli (2), Caterina Elia (3), Arnoldo Piccardo (4), Angelo  
14 Castello (1), Eugenio Borsatti (5), Pietro Zucchetta (6), Angelina Cistaro (4), Maurizio  
15 Mascarin (3) and AIEOP Hodgkin Lymphoma Study Group.  
16  
17  
18  
19  
20

- 21  
22  
23  
24  
25  
26  
27  
28  
29  
30  
31  
32  
33  
34  
35
1. Nuclear Medicine department, Humanitas Clinical and Research Hospital – IRCCS, Via Manzoni 56, 20089 Rozzano (MI), Italy;
  2. Pediatric Onco-hematologic Unit, University Hospital S. Anna, Ferrara, Italy.
  3. AYA and Pediatric Radiotherapy, IRCCS Centro di Riferimento Oncologico, Aviano, PN,
  4. Nuclear Medicine, Galliera Hospital, Genoa, Italy.
  5. Nuclear Medicine, Centro di Riferimento Oncologico, Aviano, Pordenone, Italy
  6. Nuclear Medicine Department, University Hospital, Padova, Italy.

36  
37  
38  
39  
40  
41  
42  
43  
44  
45  
46  
47  
48  
49  
50  
51  
52  
53  
54  
55  
56  
57  
58  
59  
60

**Corresponding author:**

Egest Lopci, MD, PhD

Nuclear Medicine Department

Humanitas Clinical and Research Hospital – IRCCS

Via Manzoni 56, CAP 20089, Rozzano (MI), Italy

Email: [egesta.lopci@gmail.com](mailto:egesta.lopci@gmail.com)

[egesta.lopci@cancercenter.humanitas.it](mailto:egesta.lopci@cancercenter.humanitas.it)

Roberta Burnelli, MD

Pediatric Onco-hematologic Unit

University Hospital S. Anna, Ferrara, Italy

Email: [roberta.burnelli@unife.it](mailto:roberta.burnelli@unife.it)

Caterina Elia

AYA Oncology and Pediatric Radiotherapy Unit

1  
2  
3 CRO Centro di Riferimento Oncologico IRCCS, Aviano (PN), Italy

4 Email: [eliacaterina@libero.it](mailto:eliacaterina@libero.it);  
5  
6  
7

8 Arnaldo Piccardo, MD

9 Nuclear Medicine Department

10 Galliera Hospital, Genoa, Italy.

11 Email: [arnaldo.piccardo@galliera.it](mailto:arnaldo.piccardo@galliera.it)  
12  
13  
14  
15  
16

17 Angelo Castello, MD

18 Nuclear Medicine Department

19 Humanitas Clinical and Research Hospital – IRCCS

20 Via Manzoni 56, CAP 20089, Rozzano (MI), Italy

21 Email: [angelo.castello@humanitas.it](mailto:angelo.castello@humanitas.it)  
22  
23  
24  
25  
26

27 Eugenio Borsatti, MD

28 Nuclear Medicine Department

29 CRO Centro di Riferimento Oncologico IRCCS, Aviano (PN), Italy

30 Email: [eborsatti@cro.it](mailto:eborsatti@cro.it)  
31  
32  
33  
34  
35

36 Pietro Zucchetta, MD

37 Nuclear Medicine Department

38 University Hospital, Padova, Italy

39 Email: [pietro.zucchetta@unipd.it](mailto:pietro.zucchetta@unipd.it)  
40  
41  
42  
43  
44

45 Angelina Cistaro, MD

46 Nuclear Medicine Department

47 Galliera Hospital, Genoa, Italy.

48 Email: [angelina.cistaro@galliera.it](mailto:angelina.cistaro@galliera.it)  
49  
50  
51  
52

53 Maurizio Mascarin, MD

54 AYA Oncology and Pediatric Radiotherapy Unit

55 CRO Centro di Riferimento Oncologico IRCCS, Aviano (PN), Italy

56 Email: [phl.italy@cro.it](mailto:phl.italy@cro.it); [mascarin@cro.it](mailto:mascarin@cro.it)  
57  
58  
59  
60

## ABSTRACT

**Introduction:** Assessment of response to therapy in pediatric Hodgkin lymphoma (HL) patients by <sup>18</sup>F-fluorodeoxyglucose PET/CT (FDG PET) has become a powerful tool for the discrimination of responders from non-responders. The addition of volumetric and texture analyses can be regarded as a valuable help for disease prognostication and biological characterization. Based on these premises, the AIEOP Hodgkin Lymphoma Study Group has designed a prospective evaluation of volumetric and texture analysis in the Italian cohort of patients enrolled in the EuroNet-PHL-C2.

**Methods and Analysis:** The primary objective is to compare volumetric assessment in HL patients at baseline and during the course of therapy with standard visual and semi-quantitative analyses. The secondary objective is to identify the impact of volumetric and texture analysis on bulky masses. The tertiary objective is to determine the additional value of multiparametric assessment in patients having a partial response on morphological imaging.

The overall cohort of the study is expected to be round 400-500 patients, with approximately half presenting with bulky masses. All PET scans of the Italian cohort will be analyzed for volumetric assessment, comprising metabolic tumor volume (MTV) and total lesion glycolysis (TLG) at baseline and during the course of therapy. A dedicated software will delineate semi-automatically contours using different threshold methods, and the impact of each segmentation techniques will be evaluated. Bulky will be defined on contiguous lymph node masses  $\geq 200$ ml on CT/MRI. All bulky masses will be outlined and analyzed by the same software to provide textural features. Morphological assessment will be based in RECIL 2017 for response definition.

**Ethics and Dissemination:** The current study has been ethically approved (AIFA/SC/P/27087 approved 09/03/2018; EudraCT 2012-004053-88, EM-04). The results of the different analyses performed during and after study completion the will be actively disseminated through peer-reviewed journals, conference presentations, social media, print media and internet.

**Keywords:** FDG PET; Hodgkin's lymphoma; pediatric; volumetric analysis; response assessment; texture analysis; bulky masses; interim evaluation.

## STRENGTHS AND LIMITATIONS OF THE STUDY

- This study will represent the largest analysis on volumetric and semi-quantitative parameters in pediatric HL undergoing a therapeutic trial.
- The dedicated evaluation of texture features in HL bulky masses, will allow for a solid definition of the impact of radiomics in this large pediatric population.
- Thanks to a comparative disease evaluation with both metabolic (PET) and morphological (CT/MRI) parameters, we will be able to assess the added value of the technique in pediatric HL patients presenting with a partial response to therapy.
- Since all study examinations are centrally reviewed after online platform upload of DICOM images, one limitation of the study is related to the effective retrieval of all uploaded scans.
- The segmentation used for volumetric analyses can be considered a limit, since the predefined threshold methods might not be applicable for all lesions, particularly during response assessment; hence, a preliminary validation study will be performed with this regards.
- Data extraction for radiomic features will be necessarily performed in PET exams obtained from different scanners and undergoing different reconstruction algorithms, although harmonization based on EANM guidelines is recommended for the trial.

## BACKGROUND

<sup>18</sup>F-fluorodeoxyglucose positron emission tomography (FDG PET) has become a standard diagnostic procedure for the assessment of response to therapy in adults and children with Hodgkin lymphoma. International guidelines recommend the using of Deauville five-point scale as a visual method for discriminating responders from non-responder patients [1, 2]. In 2014, the pediatric German group proposed the use of qPET with the intent to extend the Deauville score to a continuous scale and limit optical misinterpretation due to the influence of background activity [3, 4]. This quantitative method is being applied in the current EuroNet-PHL-C2 clinical trial, in which adapted therapy is based on quantitative FDG avidity of tumor masses on PET evaluation after 2 cycles of OEPA [5, 6]. This approach, however, postpones risk stratification at interim evaluation; therefore, the definition of imaging baseline predictors is highly desirable.

The implementation of metabolic tumor volume, as a sum of areas with an increased SUV inside the tumor, as well as the characterization of the heterogeneity of tumor metabolic patterns on FDG PET has become an emerging topic in nuclear medicine [7]. Several studies [8-11] have shown that the addition of volumetric and textural parameters can be a valuable help for disease prognostication and biological characterization of many tumor types, thus suggesting a similar implication for pediatric Hodgkin lymphoma [12]. While the concept of “Radiomics”, consisting on the extraction of a large quantity of features from digital images via data-characterization algorithms has gained a proper place in predicting outcome and early metabolic response in adults with malignant lymphoma [13, 14] On the other hand, the scientific background and the results obtained from our previous studies in the context of the Italian AIEOP-LH2004 trial [15, 16] suggest an additional impact of FDG PET in patients with or without bulky disease presenting with residual masses on morphological evaluation with computed tomography (CT).

Given the abovementioned premises, the AIEOP Hodgkin Lymphoma Study Group has planned to perform in the Italian cohort of patients treated according to the EuroNet-PHL-C2 trial additional volumetric analyses to improve the evaluation of tumor burden computed at baseline FDG PET and to identify prognostic factors suitable for predicting early metabolic response to therapy in pediatric Hodgkin lymphoma (HL). In case of bulky disease, further textural and shape analysis in the baseline FDG PET will be performed to evaluate macroscopic and microscopic heterogeneity of tumor masses, as reflection of their aggressiveness and different chemotherapy sensitivity.

## STUDY OBJECTIVES

This is a prospective observational multicentric cohort study. The primary objective of the study is to compare the diagnostic and prognostic role of volumetric assessment in HL patients at baseline

1  
2  
3 and during the course of therapy with standard visual (Deauville score) and semi-quantitative (i.e.  
4 SUVmax, SUVmean, SUVpeak) analyses.

5  
6 The secondary objective of the study is to identify the diagnostic and prognostic impact of texture  
7 analyses and the other metabolic parameters on bulky masses.

8  
9 The tertiary objective of the study is to determine the additional predictive and prognostic value of  
10 multiparametric assessment (i.e. SUVmax, SUVmean, SUVpeak, MTV, TLG and texture analysis)  
11 in HL patients having a partial response on morphological imaging.  
12  
13  
14  
15  
16

## 17 **ELIGIBILITY CRITERIA**

18 In accordance to the EuroNet-PHL-C2 trial, the population of our study will include pediatric  
19 patients of the Italian cohort, aged <25 years, with histologically confirmed primary diagnosis of  
20 classical Hodgkin's lymphoma, who will undergo FDG PET at baseline (PET1), after two cycles of  
21 induction OEPA therapy (PET2), and after the end of chemotherapy (PET3), in case of PET2  
22 positive patients [17]. Patients will be stratified at baseline in one of the three Treatment Levels  
23 (TL) on basis of stage and risk factors, confirmed by central review: TL-1, TL-2, TL-3 for low,  
24 intermediate and advanced HL, respectively [6, 17].  
25  
26  
27  
28  
29  
30  
31

## 32 **STUDY TIMELINE**

33 The protocol herein illustrated represents a parallel study on PET imaging performed after the  
34 EuroNet-PHL-C2 trial amendment (Amendment Nr. 04, dated 2017-07-31) on the Italian cohort of  
35 patients. The study has been also submitted and approved by the Italian authority (AIFA) the date  
36 2018-03-09. Consequently, the timeline of the protocol will be as follows: I) enrollment period will  
37 start from the 10<sup>th</sup> of March 2018 until 31<sup>st</sup> of December 2020; II) follow-up period will last 5 years  
38 after last enrolment day; III) study completion is planned before 31<sup>st</sup> December 2025.  
39  
40  
41  
42  
43  
44  
45

## 46 **METHODOLOGY**

### 47 **Whole body assessment of HL**

48 All FDG PET scans performed in the Italian cohort of patients undergoing the EuroNet-PHL-C2  
49 trail will be analyzed with additional volumetric assessment comprising metabolic tumor volume  
50 (MTV) and total lesion glycolysis (TLG) at baseline and during the course of therapy.  
51  
52

53 In each patient, HL lesions will be identified by visual analysis and corresponding SUVmax,  
54 SUVmean and SUVpeak [18] will be determined as the pixel with the highest value of uptake, the  
55 mean value of uptake and the average value of uptake in a VOI (volume of interest) of 1ml that  
56 surrounds the voxel with the highest activity, respectively. A dedicated software will be used to  
57  
58  
59  
60



delineate, semi-automatically, contours of the lesions using different threshold methods and the impact of segmentation technique will be evaluated (**Figure 1**). More specifically, four threshold methods will be used based on previously reported methodologies [19-22]:

- Fixed 41% threshold of the SUVmax within the respective lymphoma site,
- Fixed absolute SUV threshold of 2.5;
- $SUV_{max}(\text{lesion})/SUV_{mean \text{ liver}} > 1.5$
- Adaptive method:  $I(\text{threshold}) = [0.15 \times I(\text{mean})] + I(\text{background})$ .  $I(\text{mean})$  is calculated as the mean intensity of all pixels surrounded by the 70%  $I_{max}$  isocontour within the tumor;  $I(\text{background})$  is defined as a  $SUV_{mean}$  of liver [23].

After delineation of all individual lesions, patient MTV will be estimated as the sum of voxels with supra-threshold uptake, reported in ml, and TLG will be calculated as  $[MTV \times SUV_{mean}]$ .

PET2 scans will be evaluated by visual analysis on the basis of Deauville-5-points-scale assigning Inadequate Response (IR) when at least one site shows FDG uptake higher than liver uptake (scores 4 and 5). Additionally, the variation of SUVmax, determined as the percentage reduction between the SUVmax in the tumor site with the most intense uptake on PET1 and the SUVmax in the tumor site with the most intense uptake on PET2 ( $\Delta SUV_{max}$ ) [9], will be computed. Similarly, will be calculated the variation of SUVmean, SUVpeak, MTV, and TLG, respectively.

### **Assessment of bulky masses and radiomics analyses**

The definition of bulky masses will be determined as specified in EuroNet-PHL-C2 [17]. More specifically, a volume of a contiguous lymph node mass  $\geq 200\text{ml}$ , measured by the three largest diameters on CT/MRI, will be considered as bulky. All bulky masses will be outlined using different threshold methods, as explained above, and analyzed on dedicated software for semi-quantitative and volumetric parameters. The same software will provide textural and shape features for radiomics analyses. The entire feature extraction will be performed using the freeware Local Image Features Extraction (LIFEx) software (<http://www.lifexsoft.org>) [24,25].

SUVmax will be defined as the maximum uptake in the segmented tumor. SUVmean will be measured as the average uptake in the tumor burden. SUVpeak will be computed as the average SUV in a 1ml region of tumor burden around the maximal SUV voxel. MTV will be the volume of the segmented tumor. TLG will be calculated as the product of SUVmean by MTV.

Among shape parameters, asphericity, convexity and 3D fractal dimensions will be computed [15, 18, 26, 27]. For the characterization of tumor texture, two methods will be used as previously reported [11, 28, 29]: analysis of the histogram of the voxel values within the tumor and the method accounting for the spatial arrangement of voxel values. By histogram-based method, on first-order



1  
2  
3 statistics, will be computed SD (standard deviation), Entropy, Energy, kurtosis and Skewness. To  
4 define the spatial arrangement of the voxel values within the tumor, four matrices will be computed  
5 from each VOI: gray-level co-occurrence matrix (GLCM), neighborhood gray-level different matrix  
6 (NGLDM), gray-level zone length matrix (GLZLM) and gray-level run length matrix (GLRLM).  
7  
8 All parameters obtainable by the software and possible limitations are better detailed at  
9 <http://www.lifexsoft.org> [24,25].  
10  
11  
12  
13  
14

### 15 **Definition of morphological response**

16 In pediatric HL patients presenting with morphological partial response on bulky masses and/or  
17 residual lymph nodes with largest diameter  $\geq 2$  cm, a multiparametric assessment (i.e. SUVmax,  
18 SUVmean, SUVpeak, MTV, TLG and texture analysis) will be performed. For this purpose, the  
19 International Working Group consensus response evaluation criteria in lymphoma (RECIL 2017)  
20 will be used when necessary [30]. In particular, we will include in the analysis all cases with:  
21  
22  
23  
24

- 25 • Poor bulk response:  $< 50\%$  volume reduction and/or at least one nodal site with largest diameter  
26 of  $\geq 2$  cm and non-assessable qPET-value due to brown fatty tissue [17].  
27
- 28 • Partial Response:  $\geq 30\%$  decrease in the sum of longest diameters of target lesions but no  
29 complete response; positive PET (DS 4–5); any bone marrow involvement, no new lesions [30].  
30
- 31 • Minor Response:  $\geq 10\%$  decrease in the sum of longest diameters of target lesions but not a  
32 partial response [30].  
33  
34  
35  
36  
37

### 38 **Sample size calculation**

39 Given the limited number of robust data for volumetric and texture analysis in pediatric HL  
40 population, we considered adequate a sample size comprising all eligible patients. In the current  
41 study, we expect to enroll minimum 50-80 patients per year from the Italian Hodgkin Lymphoma  
42 Group out for the different AIEOP Italian Centers. Based on the data derived from the previous  
43 AIEOP-LH2004 trial, the estimated number of bulky masses is quoted around 50% of the enrolled  
44 cases. Consequently, the overall cohort to be included in the study is expected of round 400-500  
45 patients, with half presenting with bulky masses, eligible for dedicated analyses.  
46  
47  
48  
49  
50  
51  
52

### 53 **PATIENT AND PUBLIC INVOLVEMENT**

54 No patient involved  
55  
56  
57

### 58 **STATISTICAL ANALYSIS**

1  
2  
3 Descriptive statistics will be performed using conventional metrics (mean, median, range). All  
4 metabolic and heterogeneity parameters will be correlated with each other and with the disease  
5 outcome and their diagnostic and prognostic role will be investigated. For continuous data,  
6 differences between groups will be compared by the T test or the Wilcoxon test, when appropriate.  
7  
8 For rank correlation, we will use Spearman' correlation coefficient (rho). The different threshold  
9  
10 methods used to outline all individual lesions will be compared by the Pearson correlation  
11 coefficient, linear regression, Bland-Altman and logistic regression. Optimal cut-off values of the  
12 metabolic parameters and, in patients with bulky mass, also of textural/radiomics parameters for  
13 distinguishing inadequate response (IR) from adequate response (AR) to therapy will be defined by  
14 receiver operating characteristic (ROC) curves with respective areas under the curve (AUC).  
15 Patients with or without bulky mass will be divided into groups of complete metabolic response  
16 (CMR), partial metabolic response (PMR), no metabolic response (NMR) and progressive  
17 metabolic disease (PMD) and differences in metabolic and textural parameters will be investigated  
18 by analysis of variance (ANOVA). Linear regression will be applied to determine the relationship  
19 between response and all other variables. Statistical significance will be set for  $p < 0.05$ .

## 30 31 **DISCUSSION**

32 In literature there is evidence that metabolically active tumor volume determined by PET/CT is  
33 more advantageous than tumor volume measured by CT or MRI for predicting response to  
34 treatment in various malignancies afflicting both adult and the pediatric population. More  
35 specifically, in adult population, recent publications have demonstrated that the measurement of 3-  
36 dimensional disease volume (MTV) and metabolic activity (TLG) [14] can help predict outcomes in  
37 HL patients [8, 9, 14, 30-32]. This might suggest a similar implication also in pediatric HL, where  
38 the tumor volume may not change because of overlapping inflammatory processes correlated to  
39 therapy, while early changes of metabolic activity are most frequently reported.

40  
41 Along with the above mentioned semi-quantitative parameters, it is possible to extract other  
42 quantitative features from PET-CT images, including intensity, heterogeneity, and shape within the  
43 tumor, potentially reflecting underlying biological characteristics [14]. These characteristics are  
44 embedded in the so called "Radiomics", a translational field of research aiming to extract high-  
45 dimensional data from clinical images to predict underlying biological characteristics of the disease  
46 [33]. Radiomic features are correlated to prognostic markers in cancer (i.e. hypoxia, angiogenesis,  
47 proliferation, etc.) and might be utilized for tumor response prediction and outcome  
48 prognostication. In pediatric population, especially in case of advanced stage disease, high dose  
49 therapeutic regimens represent the standard to cure, yet at the expense of early and delayed side  
50  
51  
52  
53  
54  
55  
56  
57  
58  
59  
60

1  
2  
3 effects [34]. In this context, it becomes even more important to identify those factors capable of  
4 limiting the doses to the necessary therapeutic effect while reducing at maximum the undesirable  
5 consequences. These prerogatives have guided in the last decades clinical research in adult [35, 36]  
6 and pediatric HL [6, 17].  
7  
8  
9

10 In the present study, we aim to identify prospectively the role of volumetric and texture (radiomic)  
11 characteristics better fulfilling the need for predictive and prognostic factors in pediatric HL.  
12 Thanks to a large sample size and to a preliminary methodological validation, we expect to obtain  
13 significant data on the added value of volumetric and texture analysis on FDG PET assessment in  
14 pediatric Hodgkin Lymphoma.  
15  
16  
17  
18  
19  
20  
21  
22  
23  
24  
25  
26  
27  
28  
29  
30  
31  
32  
33  
34  
35  
36  
37  
38  
39  
40  
41  
42  
43  
44  
45  
46  
47  
48  
49  
50  
51  
52  
53  
54  
55  
56  
57  
58  
59  
60

**LIST OF ABBREVIATIONS**

AIEOP = Associazione Italiana di Ematologia e Oncologia Pediatrica

CT = computed tomography

DS = Deauville score

FDG = 18F-fluorodeoxyglucose

GLCM = gray-level co-occurrence matrix

GLRLM = gray-level run length matrix

GLZLM = gray-level zone length matrix

HL = Hodgkin lymphoma

MRI = magnetic resonance imaging

MTV = metabolic tumor volume

NGLDM = neighborhood gray-level different matrix

OEPA = Vincristine Sulfate (Oncovin), Etoposide Phosphate, Prednisone, Doxorubicin Hydrochloride (Adriamycin)

PET = positron emission tomography

SD = standard deviation

SUV = standardized uptake value

TLG = total lesion glycolysis

VOI = volume of interest

## DECLARATIONS

## ETHICS APPROVAL AND CONSENT TO PARTICIPATE

The current study has been approved by AIFA (Agenzia Italiana del Farmaco) the 9<sup>th</sup> of March 2018 (EudraCT 2012-004053-88, EM-04; AIFA/SC/P/27087 approved 09/03/2018). All procedures involving human participants will be performed in accordance with the ethical standards of the institutional and/or national research committee and with the principles of the 1964 Declaration of Helsinki and its later amendments or comparable ethical standards. All patients will sign a written informed consent to participate in the study.

## CONSENT FOR PUBLICATION

Not applicable

## AVAILABILITY OF DATA AND MATERIAL

Not applicable

## COMPETING INTERESTS

The author(s) declare that they have no competing interests.

## AUTHORS' CONTRIBUTION

EL, CE, RB and MM planned, coordinated and conducted the study. Medical care is covered by the AIEOP Centers for the Hodgkin Lymphoma Study Group. Scientific program is planned by MM, EL, RB. Authors read and approved the final manuscript.

## FUNDING

Fondazione Umberto Veronesi has provided support to the study with three fellowship grants. AGMEN (Associazione Genitori Malati Emato-Oncologici) is supporting the study by covering the expenses for the central revision platform of the trial.

## ACKNOWLEDGEMENTS

AIEOP (Associazione Italiana Ematologia Oncologia Pediatrica) Hodgkin Lymphoma Study Group. The authors would like to thank E. Maziotti for the support in the study analyses.

## REFERENCES

1. Cheson, B.D., et al. Recommendations for Initial Evaluation, Staging, and Response Assessment of Hodgkin and Non-Hodgkin Lymphoma: The Lugano Classification. *J Clin Oncol.* 2014, Vol. 32, 27, p. 3059-67.
2. Barrington, S.F., et al. Role of Imaging in the Staging and Response Assessment of Lymphoma: Consensus of International Conference on Malignant Lymphomas Imaging Working Group. *J Clin Oncol.* 2014, Vol. 32, 27, p. 3048-58.
3. Barrington, S.F., et al. FDG PET for therapy monitoring in Hodgkin and non-Hodgkin lymphoma. *Eur J Nucl Med Mol Imaging.* 2017, Vol. 44, p. 97-110.
4. Hasenclever D., et al. qPET – a quantitative extension of the Deauville scale to assess response in interim FDG-PET scans in lymphoma. *Eur J Nucl Med Mol Imaging.* 2014, Vol. 41, p. 1301-8.
5. Mauz-Körholz C., et al. Procarbazine-free OEPA-COPDAC chemotherapy in boys and standard OPPA-COPP in girls have comparable effectiveness in pediatric Hodgkin's lymphoma: the GPOH-HD-2002 study. *J Clin Oncol.* 2016, Vol. 28, 23, p. 3680-6.
6. Rogasch JMM, et al. Pretherapeutic FDG-PET total metabolic tumor volume predicts response to induction therapy in pediatric Hodgkin's lymphoma. *BMC Cancer.* 2018; Vol. 18: p.521
7. Kostakoglu, L., et al. FDG-PET imaging for Hodgkin Lymphoma: Current use and future applications. *Clin Adv Hematol Oncol.* 2014, Vol. 12, p. 20-35.
8. Meignan, M., et al. Metabolic tumor volumes measured at staging in lymphoma: Methodological evaluation on phantom experiments and patients. *Eur J Nucl Med Mol Imaging.* 2014, Vol. 41, p. 1113-1122.
9. Kanoun, S., et al. Baseline metabolic tumor volume is an independent prognostic factor in Hodgkin lymphoma. *Nucl Med Mol Imaging.* 2014, Vol. 41, p. 1735-1743.
10. Brooks, F.J., et al. Low-order non-spatial effects dominate second-order spatial effects in the texture quantifier analysis of 18F-FDG-PET images. *PLoS One.* 2015, Vol. 10, p. e0116574.
11. Buvat, I., et al. Tumor texture analysis in PET: Where do we stand? *J Nucl Med.* 2015, Vol. 56, p. 1642-44.
12. Kluge, R., et al. Current Role of FDG-PET in Pediatric Hodgkin's Lymphoma. *Semin Nucl Med.* 2017, Vol. 47, p. 242-257.

13. Ben Bouallegue, F. et al. Association between textural and morphological tumor indices on baseline PET-CT and early metabolic response on interim PET-CT in bulky malignant lymphomas. *Med Phys* 2017; Vol. 44, p. 4608–4619.
14. Milgrom, S.A., et al. A PET Radiomics Model to Predict Refractory Mediastinal Hodgkin Lymphoma. *Sci Rep.* 2019, Vol. 9, p. 1322.
15. Lopci, E., et al. Postchemotherapy PET evaluation correlates with patient outcome in paediatric Hodgkin's disease. *Eur J Nucl Med Mol Imaging.* 2011, Vol. 38, 9, p. 1620-7.
16. Lopci, E., et al. Additional role of FDG-PET in paediatric HD patients presenting with a partial response on CT: data deriving from a multicentric Italian study. *Eur J Nucl Med Mol Imaging.* 2012, Vol. 39, p. S155–S303.
17. Second International Inter-Group Study for Classical Hodgkin Lymphoma in Children and Adolescents. Final protocol version, 1st amendment. <https://clinicaltrials.gov/ct2/show/NCT02684708>.
18. Vanderhoek, M., et al. Impact of the Definition of Peak Standardized Uptake Value on Quantification of Treatment Response. *J Nucl Med.* 2012, Vol. 53, p. 4-11.
19. Boellaard, R., et al. FDG PET and PET/CT: EANM procedure guidelines for tumour PET imaging: version 1.0. *Eur J Nucl Med Mol Imaging.* 2010, Vol. 37, p. 181-200.
20. Ben Bouallègue, F., et al. Association between textural and morphological tumor indices on baseline PET-CT and early metabolic response on interim PET-CT in bulky malignant lymphomas. *Med Phys.* 2017, Vol. 44, p. 4608-19.
21. Mettler, J., et al. Metabolic Tumour Volume for Response Prediction in Advanced-Stage Hodgkin Lymphoma. *J Nucl Med.* 2018.
22. Cottreau, A.S., et al. Prognostic value of baseline metabolic tumor volume in early-stage Hodgkin lymphoma in the standard arm of the H10 trial. *Blood.* 2018, Vol. 131, p. 1456-63.
23. Nestle U., et al. Comparison of different methods for delineation of 18F-FDG PET-positive tissue for target volume definition in radiotherapy of patients with non-Small cell lung cancer. *J Nucl Med.* 2005; Vol. 46: p.1342-8.

- 1  
2  
3 24. Nioche. C., et al. A software for characterizing intra-tumor heterogeneity in multimodality  
4 imaging and establishing reference charts. *Eur J Nucl Med Mol Imaging*. 2016; Vol. 43: S156-  
5 S157.  
6  
7
- 8  
9 25. Parvez, A., et al. 18F-FDG PET/CT metabolic tumor parameters and radiomics features in  
10 aggressive non-Hodgkin's lymphoma as predictors of treatment outcome and survival. *Ann*  
11 *Nucl Med*. 2018; Vol. 32,p. 410–416.  
12  
13
- 14  
15 26. Castello, A., et al. Prognostic Impact of Intratumoral Heterogeneity Based on Fractal Geometry  
16 Analysis in Operated NSCLC Patients. *Mol Imaging Biol*. 2018, p. 965–972.  
17  
18
- 19  
20 27. Grizzi, F., et al. The Complexity and Fractal Geometry of Nuclear Medicine Images. *Mol*  
21 *Imaging Biol*. 2018, p. 401–409.  
22  
23
- 24  
25 28. Orlhac, F., et al. Tumor Texture Analysis in 18F-FDG PET: Relationships Between Texture  
26 Parameters, Histogram Indices, Standardized Uptake Values, Metabolic Volumes, and Total  
27 Lesion Glycolysis. *J Nucl Med*. 2014, Vol. 55, p. 414-422.  
28  
29
- 30  
31 29. Ganeshan, B., et al. CT-based texture analysis potentially provides prognostic information  
32 complementary to interim fdg-pet for patients with hodgkin's and aggressive non-hodgkin's  
33 lymphomas. *Eur Radiol*. 2017, Vol. 27, p. 1012-1020.  
34  
35
- 36  
37 30. Younes A. et al, International Working Group consensus response evaluation criteria in  
38 lymphoma (RECIL 2017). *Ann Oncol*. 2017;Vol. 28: P. 1436-1447.  
39
- 40  
41 31. Song MK. et al., Metabolic tumor volume by positron emission tomography/computed  
42 tomography as a clinical parameter to determine therapeutic modality for early stage Hodgkin's  
43 lymphoma. *Cancer Sci* 2013; Vol. 104: p. 1656-61.  
44  
45
- 46  
47 32. Akhtari M., et al. Reclassifying patients with early-stage Hodgkin lymphoma based on  
48 functional radiographic markers at presentation. *Blood*. 2018; Vol. 131: p. 84-94.  
49
- 50  
51 33. Rizzo S, et al. Radiomics: the facts and the challenges of image analysis. *Eur Radiol Exp*  
52 2018;2:36.  
53  
54
- 55  
56 34. Lackner H., et al, Prospectiveevaluation of late effects after childhood cancer therapy with  
57 follow-up over 9 years. *Eur J Pediatr* 2000; Vol. 159: p. 750-758.  
58  
59  
60



1  
2  
3  
4  
5  
6  
7  
8  
9  
10  
11  
12  
13  
14  
15  
16  
17  
18  
19  
20  
21  
22  
23  
24  
25  
26  
27  
28  
29  
30  
31  
32  
33  
34  
35  
36  
37  
38  
39  
40  
41  
42  
43  
44  
45  
46  
47  
48  
49  
50  
51  
52  
53  
54  
55  
56  
57  
58  
59  
60

35. Borchmann P, et al. PET-guided treatment in patients with advanced-stage Hodgkin's lymphoma (HD18): final results of an open-label, international, randomised phase 3 trial by the German Hodgkin study group. *Lancet*. 2018;Vol. 390: p. 2790–802.
36. Casasnovas RO, et al. PET-adapted treatment for newly diagnosed advanced Hodgkin lymphoma (AHL2011): a randomised, multicentre, non-inferiority, phase 3 study. *Lancet Oncol* 2019; Vol. 20: p. 202-215.

For peer review only

## FIGURE LEGEND

**Figure 1:** Comparative representation of the four segmentation techniques applied in our study protocol illustrated from left to right: fixed 41% threshold (V41%); fixed absolute SUV threshold of 2.5 (V2.5); SUVmax(lesion)/SUVmean liver >1.5 (Vliver); and adaptative method (AM). The same HL patient has been analyzed according to the above mentioned techniques and corresponding TMTV (total metabolic tumor volumes) at baseline have been displayed for comparison.

For peer review only

1  
2  
3  
4  
5  
6  
7  
8  
9  
10  
11  
12  
13  
14  
15  
16  
17  
18  
19  
20  
21  
22  
23  
24  
25  
26  
27  
28  
29  
30  
31  
32  
33  
34  
35  
36  
37  
38  
39  
40  
41  
42  
43  
44

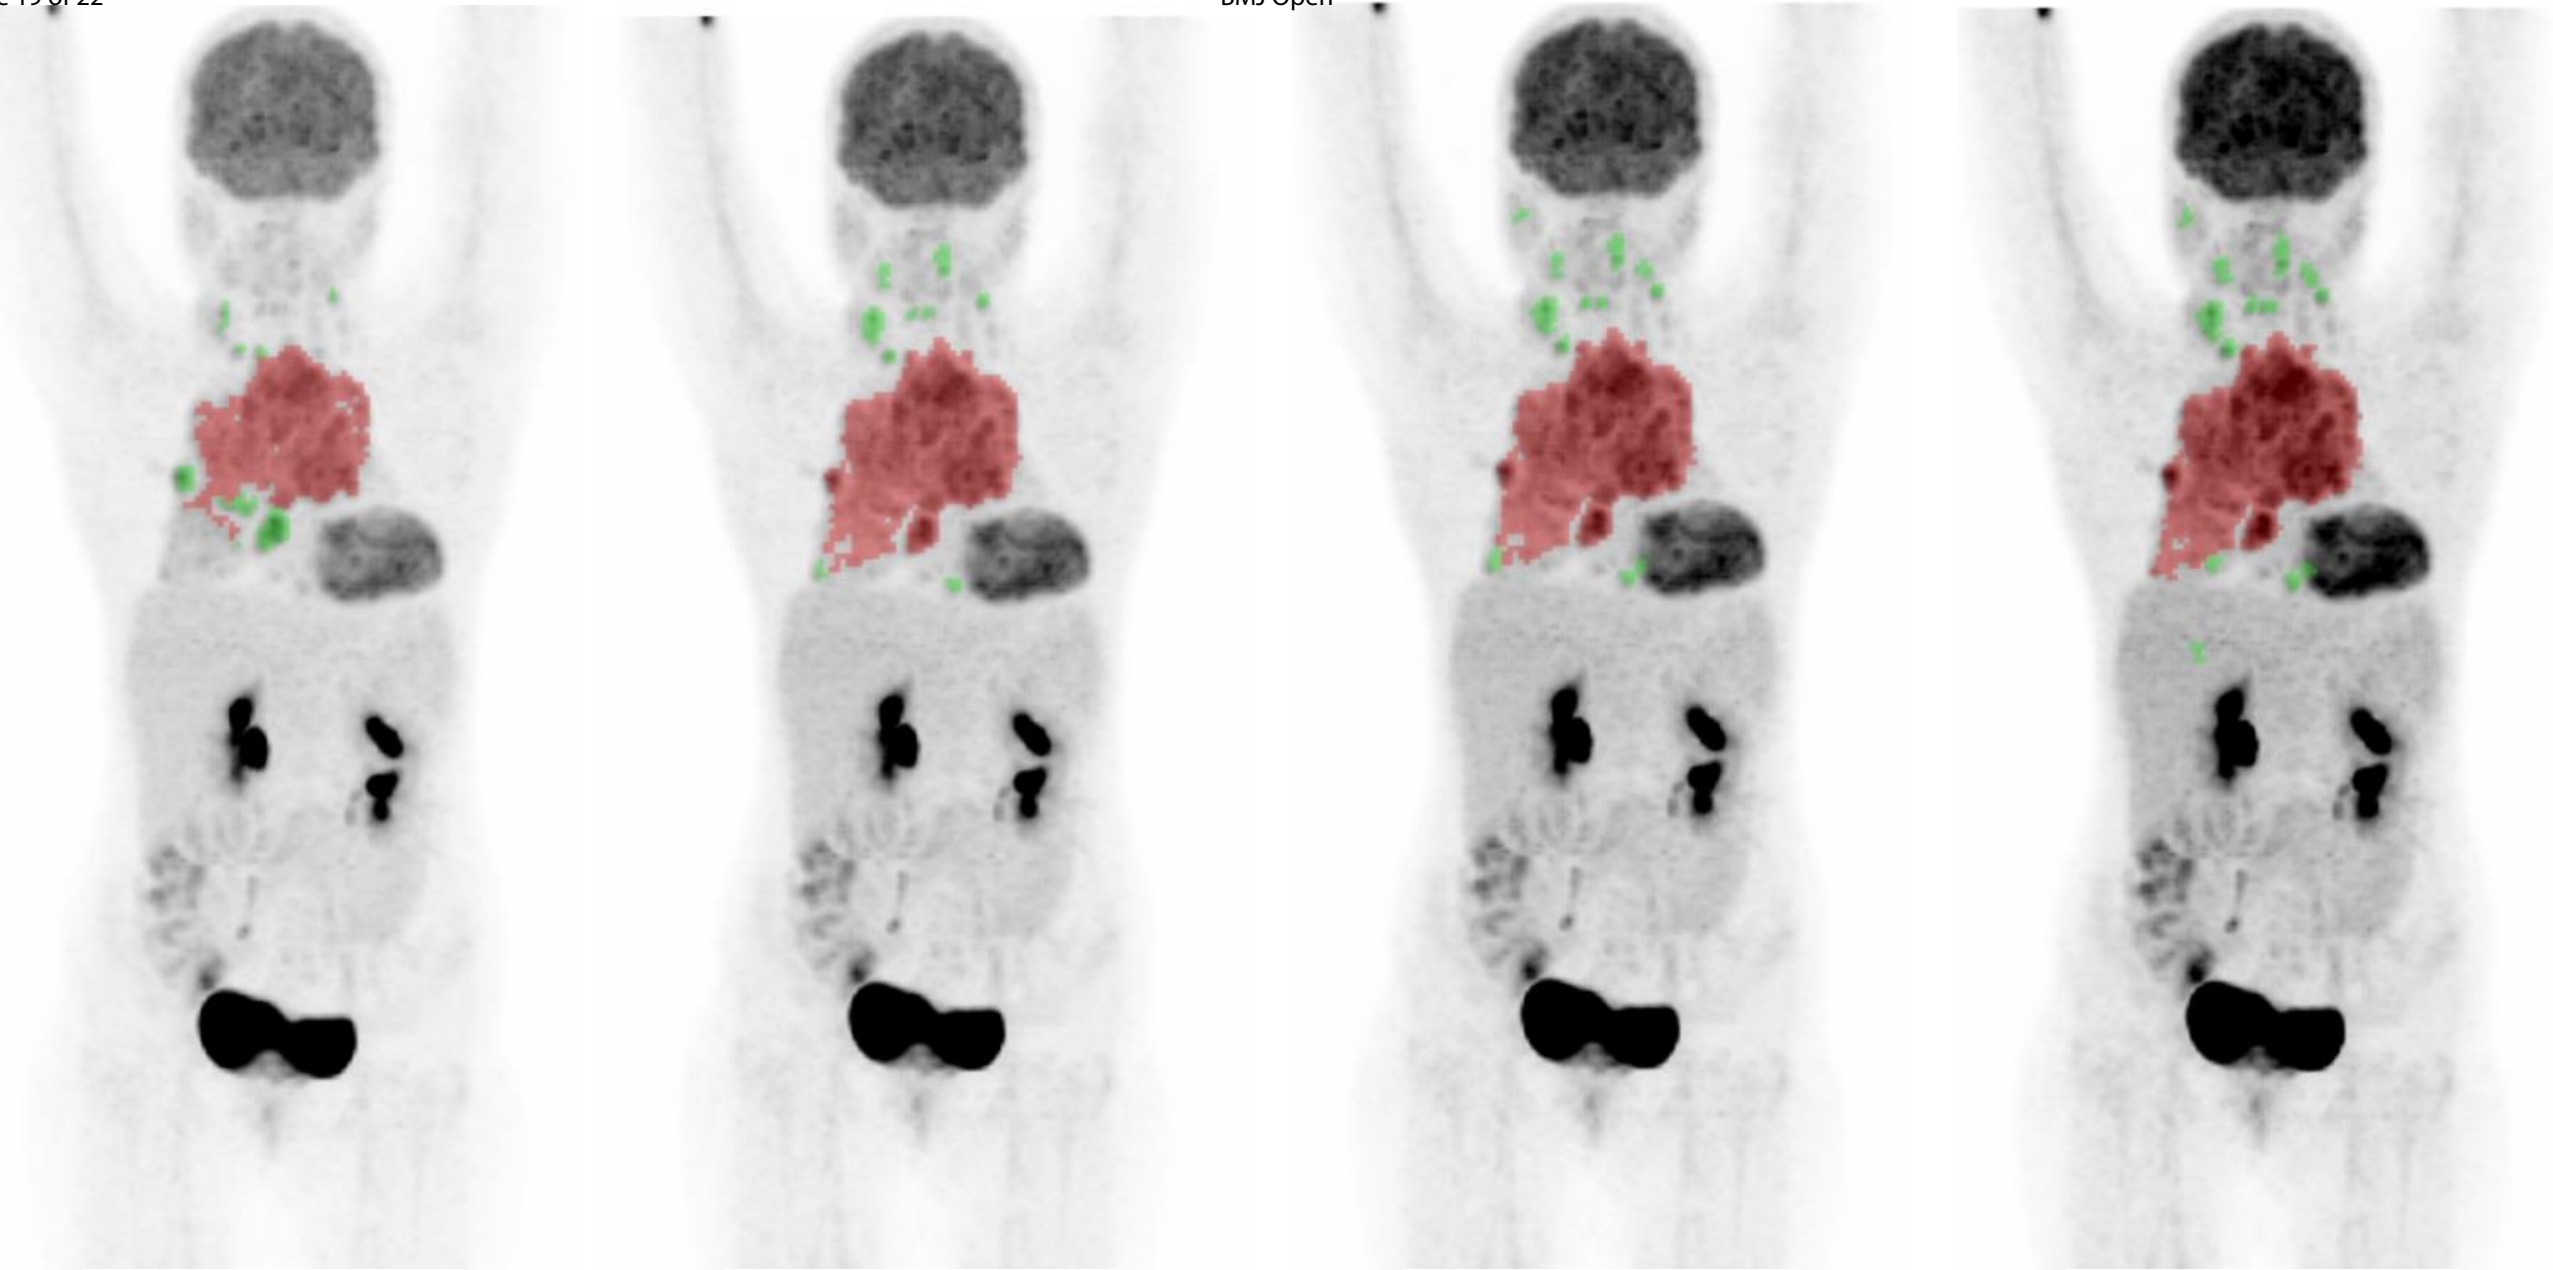

TMTV (V41%) Baseline  
242,30

TMTV (V2.5) Baseline  
471,00

TMTV (Vliver) Baseline  
500,40

TMTV (AM) Baseline  
538,3

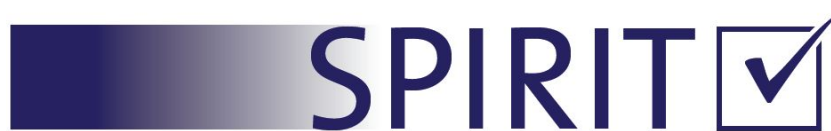

STANDARD PROTOCOL ITEMS: RECOMMENDATIONS FOR INTERVENTIONAL TRIALS

SPIRIT 2013 Checklist: Recommended items to address in a clinical trial protocol and related documents\*

| Section/item                      | Item No | Description                                                                                                                                                                                                                                                                                                                                                                                                                                                                                                                                                                                                                                                                                                                                                                                                                                      |
|-----------------------------------|---------|--------------------------------------------------------------------------------------------------------------------------------------------------------------------------------------------------------------------------------------------------------------------------------------------------------------------------------------------------------------------------------------------------------------------------------------------------------------------------------------------------------------------------------------------------------------------------------------------------------------------------------------------------------------------------------------------------------------------------------------------------------------------------------------------------------------------------------------------------|
| <b>Administrative information</b> |         |                                                                                                                                                                                                                                                                                                                                                                                                                                                                                                                                                                                                                                                                                                                                                                                                                                                  |
| Title                             | 1       | Additional value of volumetric and texture analysis on FDG PET assessment in pediatric Hodgkin Lymphoma in the context of the euronet-PHL-C2-Trial.                                                                                                                                                                                                                                                                                                                                                                                                                                                                                                                                                                                                                                                                                              |
| Trial registration                | 2a      | EudraCT 2012-004053-88, EM-04;                                                                                                                                                                                                                                                                                                                                                                                                                                                                                                                                                                                                                                                                                                                                                                                                                   |
|                                   | 2b      | AIFA/SC/P/27087 approved 9th of March 2018                                                                                                                                                                                                                                                                                                                                                                                                                                                                                                                                                                                                                                                                                                                                                                                                       |
| Protocol version                  | 3       | Amendment Nr. 04 to the protocol 4.0 final version 2017-07-31                                                                                                                                                                                                                                                                                                                                                                                                                                                                                                                                                                                                                                                                                                                                                                                    |
| Funding                           | 4       | Declarations, article page 10                                                                                                                                                                                                                                                                                                                                                                                                                                                                                                                                                                                                                                                                                                                                                                                                                    |
| Roles and responsibilities        | 5a      | Responsible investigators:<br>Egest Lopci, MD, PhD, Nuclear Medicine department, Humanitas Clinical and Research Hospital – IRCCS, Rozzano (MI), Italy<br>Maurizio Mascarin, MD, AYA and Pediatric Radiotherapy IRCCS Centro di Riferimento Oncologico<br>Roberta Burnelli, MD, Pediatric Onco-hematologic Unit, University Hospital S. Anna, Ferrara<br>Caterina Elia, AYA and Pediatric Radiotherapy, IRCCS Centro di Riferimento Oncologico<br>Arnoldo Piccardo, MD, Nuclear Medicine department, Galliera Hospital, Genoa, Italy.<br>Eugenio Borsatti, MD, Nuclear Medicine department, Centro di Riferimento Oncologico, Aviano, Pordenone, Italy<br>Pietro Zucchetta, MD, Nuclear Medicine Department, University Hospital, Padova, Italy<br>Angelina Cistaro, MD, Positron Emission Tomography Centre, IRMET S.p.A. Affidea, Turin, Italy |
|                                   | 5b      | Maurizio Mascarin, MD, AYA and Pediatric Radiotherapy IRCCS Centro di Riferimento Oncologico                                                                                                                                                                                                                                                                                                                                                                                                                                                                                                                                                                                                                                                                                                                                                     |
|                                   | 5c      | As per EuroNet-PHL-C2 amendment Nr. 04 to the protocol 4.0 final version 2017-07-31 and AIEOP Hodgkin Lymphoma Study Group                                                                                                                                                                                                                                                                                                                                                                                                                                                                                                                                                                                                                                                                                                                       |
|                                   | 5d      | As per EuroNet-PHL-C2 amendment Nr. 04 to the protocol 4.0 final version 2017-07-31 and AIEOP Hodgkin Lymphoma Study Group                                                                                                                                                                                                                                                                                                                                                                                                                                                                                                                                                                                                                                                                                                                       |

**Introduction**

|    |                |    |                                                                |
|----|----------------|----|----------------------------------------------------------------|
| 1  |                |    |                                                                |
| 2  | Background and | 6a | Background, article page 4                                     |
| 3  | rationale      |    |                                                                |
| 4  |                |    |                                                                |
| 5  |                | 6b | Background, article page 4                                     |
| 6  |                |    |                                                                |
| 7  | Objectives     | 7  | Study objectives, article page 4                               |
| 8  |                |    |                                                                |
| 9  | Trial design   | 8  | This is a prospective observational multicentric cohort study. |
| 10 |                |    |                                                                |
| 11 |                |    |                                                                |
| 12 |                |    |                                                                |
| 13 |                |    |                                                                |
| 14 |                |    |                                                                |

### Methods: Participants, interventions, and outcomes

|    |                      |     |                                                                                     |
|----|----------------------|-----|-------------------------------------------------------------------------------------|
| 15 |                      |     |                                                                                     |
| 16 |                      |     |                                                                                     |
| 17 | Study setting        | 9   | As per EuroNet-PHL-C2 amendment Nr. 04 to the protocol 4.0 final version 2017-07-31 |
| 18 |                      |     |                                                                                     |
| 19 |                      |     |                                                                                     |
| 20 | Eligibility criteria | 10  | Eligibility criteria, article page 5                                                |
| 21 |                      |     |                                                                                     |
| 22 | Interventions        | 11a | N/A                                                                                 |
| 23 |                      |     |                                                                                     |
| 24 |                      | 11b | As per EuroNet-PHL-C2 amendment Nr. 04 to the protocol 4.0 final version 2017-07-31 |
| 25 |                      |     |                                                                                     |
| 26 |                      | 11c | As per EuroNet-PHL-C2 amendment Nr. 04 to the protocol 4.0 final version 2017-07-31 |
| 27 |                      |     |                                                                                     |
| 28 |                      | 11d | As per EuroNet-PHL-C2 amendment Nr. 04 to the protocol 4.0 final version 2017-07-31 |
| 29 |                      |     |                                                                                     |
| 30 |                      |     |                                                                                     |
| 31 |                      |     |                                                                                     |
| 32 |                      |     |                                                                                     |
| 33 | Outcomes             | 12  | Study objectives, article page                                                      |
| 34 |                      |     |                                                                                     |
| 35 | Participant          | 13  | As per EuroNet-PHL-C2 amendment Nr. 04 to the protocol 4.0 final version 2017-07-31 |
| 36 | timeline             |     |                                                                                     |
| 37 |                      |     |                                                                                     |
| 38 |                      |     |                                                                                     |
| 39 | Sample size          | 14  | Sample size calculation, article page 7                                             |
| 40 |                      |     |                                                                                     |
| 41 | Recruitment          | 15  | AIEOP Hodgkin Lymphoma Study Group                                                  |
| 42 |                      |     |                                                                                     |

### Methods: Assignment of interventions (for controlled trials)

#### Allocation:

|    |                |     |                                                                                     |
|----|----------------|-----|-------------------------------------------------------------------------------------|
| 43 |                |     |                                                                                     |
| 44 |                |     |                                                                                     |
| 45 |                |     |                                                                                     |
| 46 |                |     |                                                                                     |
| 47 | Sequence       | 16a | As per EuroNet-PHL-C2 amendment Nr. 04 to the protocol 4.0 final version 2017-07-31 |
| 48 | generation     |     |                                                                                     |
| 49 |                |     |                                                                                     |
| 50 | Allocation     | 16b | As per EuroNet-PHL-C2 amendment Nr. 04 to the protocol 4.0 final version 2017-07-31 |
| 51 | concealment    |     |                                                                                     |
| 52 | mechanism      |     |                                                                                     |
| 53 |                |     |                                                                                     |
| 54 | Implementation | 16c | As per EuroNet-PHL-C2 amendment Nr. 04 to the protocol 4.0 final version 2017-07-31 |
| 55 |                |     |                                                                                     |
| 56 |                |     |                                                                                     |
| 57 |                |     |                                                                                     |
| 58 | Blinding       | 17a | Open label                                                                          |
| 59 | (masking)      |     |                                                                                     |
| 60 |                |     |                                                                                     |

1  
2  
3  
4  
5  
6  
7  
8  
9  
10  
11  
12  
13  
14  
15  
16  
17  
18  
19  
20  
21  
22  
23  
24  
25  
26  
27  
28  
29  
30  
31  
32  
33  
34  
35  
36  
37  
38  
39  
40  
41  
42  
43  
44  
45  
46  
47  
48  
49  
50  
51  
52  
53  
54  
55  
56  
57  
58  
59  
60

17b N/A

### Methods: Data collection, management, and analysis

|                         |     |                                                                                                                             |
|-------------------------|-----|-----------------------------------------------------------------------------------------------------------------------------|
| Data collection methods | 18a | Statistical Analysis, article page 7                                                                                        |
|                         | 18b | As per EuroNet-PHL-C2 amendment Nr. 04 to the protocol 4.0 final version 2017-07-31 and AIEOP Hodgkin Lymphoma Study Group  |
| Data management         | 19  | As per EuroNet-PHL-C2 amendment Nr. 04 to the protocol 4.0 final version 2017-07-31 and AIEOP Hodgkin Lymphoma Study Group  |
| Statistical methods     | 20a | Statistical Analysis, article page 7                                                                                        |
|                         | 20b | Statistical Analysis, article page 7                                                                                        |
|                         | 20c | As per EuroNet-PHL-C2 amendment Nr. 04 to the protocol 4.0 final version 2017-07-31 and AIEOP Hodgkin Lymphoma Study Group) |

### Methods: Monitoring

|                 |     |                                                                                                                            |
|-----------------|-----|----------------------------------------------------------------------------------------------------------------------------|
| Data monitoring | 21a | As per EuroNet-PHL-C2 amendment Nr. 04 to the protocol 4.0 final version 2017-07-31 and AIEOP Hodgkin Lymphoma Study Group |
|                 | 21b | As per EuroNet-PHL-C2 amendment Nr. 04 to the protocol 4.0 final version 2017-07-31 and AIEOP Hodgkin Lymphoma Study Group |
| Harms           | 22  | As per EuroNet-PHL-C2 amendment Nr. 04 to the protocol 4.0 final version 2017-07-31 and AIEOP Hodgkin Lymphoma Study Group |
| Auditing        | 23  | As per EuroNet-PHL-C2 amendment Nr. 04 to the protocol 4.0 final version 2017-07-31 and AIEOP Hodgkin Lymphoma Study Group |

### Ethics and dissemination

|                          |     |                                                                                                              |
|--------------------------|-----|--------------------------------------------------------------------------------------------------------------|
| Research ethics approval | 24  | The protocol has been already board (REC/IRB) approved                                                       |
| Protocol amendments      | 25  | N/A                                                                                                          |
| Consent or assent        | 26a | Local investigators affiliated to the AIEOP (Associazione Italiana Ematologia Oncologia Pediatrica) centers. |
|                          | 26b | N/A                                                                                                          |
| Confidentiality          | 27  | As per EuroNet-PHL-C2 protocol and AIEOP policy                                                              |
| Declaration of interests | 28  | Declarations, article page 10                                                                                |
| Access to data           | 29  | As per EuroNet-PHL-C2 protocol and AIEOP policy                                                              |

|    |                 |     |                                                                         |
|----|-----------------|-----|-------------------------------------------------------------------------|
| 1  |                 |     |                                                                         |
| 2  | Ancillary and   | 30  | N/A                                                                     |
| 3  | post-trial care |     |                                                                         |
| 4  |                 |     |                                                                         |
| 5  | Dissemination   | 31a | Trial results will be communicated to participants, healthcare          |
| 6  | policy          |     | professionals, the public, and other relevant groups via scientific and |
| 7  |                 |     | congress publications.                                                  |
| 8  |                 |     |                                                                         |
| 9  |                 | 31b | Authorship eligibility will be provided to investigators based on their |
| 10 |                 |     | contribution to the study.                                              |
| 11 |                 |     |                                                                         |
| 12 |                 | 31c | As per EuroNet-PHL-C2 protocol and AIEOP policy                         |
| 13 |                 |     |                                                                         |
| 14 |                 |     |                                                                         |

## Appendices

|    |                  |    |                                                                  |
|----|------------------|----|------------------------------------------------------------------|
| 15 |                  |    |                                                                  |
| 16 |                  |    |                                                                  |
| 17 | Informed consent | 32 | As per EuroNet-PHL-C2 amendment Nr. 04 to the protocol 4.0 final |
| 18 | materials        |    | version 2017-07-31                                               |
| 19 |                  |    |                                                                  |
| 20 | Biological       | 33 | N/A                                                              |
| 21 | specimens        |    |                                                                  |
| 22 |                  |    |                                                                  |

---

\*It is strongly recommended that this checklist be read in conjunction with the SPIRIT 2013 Explanation & Elaboration for important clarification on the items. Amendments to the protocol should be tracked and dated. The SPIRIT checklist is copyrighted by the SPIRIT Group under the Creative Commons "[Attribution-NonCommercial-NoDerivs 3.0 Unported](https://creativecommons.org/licenses/by-nc-nd/3.0/)" license.

# BMJ Open

## Additional value of volumetric and texture analysis on FDG PET assessment in pediatric Hodgkin Lymphoma: an Italian multicentric study protocol.

|                                 |                                                                                                                                                                                                                                                                                                                                                                                                                                                                                                                                                                                                                                                                                                                                                                                                                                    |
|---------------------------------|------------------------------------------------------------------------------------------------------------------------------------------------------------------------------------------------------------------------------------------------------------------------------------------------------------------------------------------------------------------------------------------------------------------------------------------------------------------------------------------------------------------------------------------------------------------------------------------------------------------------------------------------------------------------------------------------------------------------------------------------------------------------------------------------------------------------------------|
| Journal:                        | <i>BMJ Open</i>                                                                                                                                                                                                                                                                                                                                                                                                                                                                                                                                                                                                                                                                                                                                                                                                                    |
| Manuscript ID                   | bmjopen-2020-041252.R2                                                                                                                                                                                                                                                                                                                                                                                                                                                                                                                                                                                                                                                                                                                                                                                                             |
| Article Type:                   | Protocol                                                                                                                                                                                                                                                                                                                                                                                                                                                                                                                                                                                                                                                                                                                                                                                                                           |
| Date Submitted by the Author:   | 27-Feb-2021                                                                                                                                                                                                                                                                                                                                                                                                                                                                                                                                                                                                                                                                                                                                                                                                                        |
| Complete List of Authors:       | Lopci, Egesta; IRCCS Humanitas Research Hospital, Nuclear Medicine Department<br>Burnelli, Roberta; University Hospital Arcispedale Sant'Anna of Ferrara, Pediatric Onco-hematologic Unit<br>Elia, Caterina; Centro di Riferimento Oncologico, AYA Oncology and Pediatric Radiotherapy Unit<br>Piccardo, Arnoldo; Ente Ospedaliero Ospedali Galliera, Nuclear Medicine Department<br>Castello, Angelo; IRCCS Humanitas Research Hospital, Nuclear Medicine Department<br>Borsatti, Eugenio; Centro di Riferimento Oncologico, Nuclear Medicine Department<br>Zucchetta, Pietro; Padua University Hospital, Nuclear Medicine Department<br>Cistaro, Angelina; Ente Ospedaliero Ospedali Galliera, Nuclear Medicine Department<br>Mascarin, Maurizio; Centro di Riferimento Oncologico, AYA Oncology and Pediatric Radiotherapy Unit |
| <b>Primary Subject Heading</b>: | Oncology                                                                                                                                                                                                                                                                                                                                                                                                                                                                                                                                                                                                                                                                                                                                                                                                                           |
| Secondary Subject Heading:      | Paediatrics                                                                                                                                                                                                                                                                                                                                                                                                                                                                                                                                                                                                                                                                                                                                                                                                                        |
| Keywords:                       | Lymphoma < HAEMATOLOGY, Nuclear radiology < RADIOLOGY & IMAGING, Protocols & guidelines < HEALTH SERVICES ADMINISTRATION & MANAGEMENT                                                                                                                                                                                                                                                                                                                                                                                                                                                                                                                                                                                                                                                                                              |
|                                 |                                                                                                                                                                                                                                                                                                                                                                                                                                                                                                                                                                                                                                                                                                                                                                                                                                    |

SCHOLARONE™  
Manuscripts





I, the Submitting Author has the right to grant and does grant on behalf of all authors of the Work (as defined in the below author licence), an exclusive licence and/or a non-exclusive licence for contributions from authors who are: i) UK Crown employees; ii) where BMJ has agreed a CC-BY licence shall apply, and/or iii) in accordance with the terms applicable for US Federal Government officers or employees acting as part of their official duties; on a worldwide, perpetual, irrevocable, royalty-free basis to BMJ Publishing Group Ltd ("BMJ") its licensees and where the relevant Journal is co-owned by BMJ to the co-owners of the Journal, to publish the Work in this journal and any other BMJ products and to exploit all rights, as set out in our [licence](#).

The Submitting Author accepts and understands that any supply made under these terms is made by BMJ to the Submitting Author unless you are acting as an employee on behalf of your employer or a postgraduate student of an affiliated institution which is paying any applicable article publishing charge ("APC") for Open Access articles. Where the Submitting Author wishes to make the Work available on an Open Access basis (and intends to pay the relevant APC), the terms of reuse of such Open Access shall be governed by a Creative Commons licence – details of these licences and which [Creative Commons](#) licence will apply to this Work are set out in our licence referred to above.

Other than as permitted in any relevant BMJ Author's Self Archiving Policies, I confirm this Work has not been accepted for publication elsewhere, is not being considered for publication elsewhere and does not duplicate material already published. I confirm all authors consent to publication of this Work and authorise the granting of this licence.

1  
2  
3  
4  
5  
6  
7  
8  
9  
10  
11  
12  
13  
14  
15  
16  
17  
18



**Additional value of volumetric and texture analysis on FDG PET assessment in pediatric Hodgkin Lymphoma: an Italian multicentric study protocol.**

19  
20  
21  
22  
23  
24  
25  
26  
27  
28  
29  
30  
31  
32  
33

Egesta Lopci (1), Roberta Burnelli (2), Caterina Elia (3), Arnoldo Piccardo (4), Angelo Castello (1), Eugenio Borsatti (5), Pietro Zucchetta (6), Angelina Cistaro (4), Maurizio Mascarin (3) and AIEOP Hodgkin Lymphoma Study Group.

- 34  
35  
36  
37  
38  
39  
40  
41  
42  
43  
44  
45  
46  
47  
48  
49  
50  
51  
52  
53  
54  
55  
56  
57  
58  
59  
60
1. Nuclear Medicine department, IRCCS - Humanitas Research Hospital, Via Manzoni 56, 20089 Rozzano (MI), Italy;
  2. Pediatric Onco-hematologic Unit, University Hospital S. Anna, Ferrara, Italy.
  3. AYA and Pediatric Radiotherapy, IRCCS Centro di Riferimento Oncologico, Aviano, PN,
  4. Nuclear Medicine, Galliera Hospital, Genoa, Italy.
  5. Nuclear Medicine, Centro di Riferimento Oncologico, Aviano, Pordenone, Italy
  6. Nuclear Medicine Department, University Hospital, Padova, Italy.

**Corresponding author:**

Egest Lopci, MD, PhD

Nuclear Medicine Department

IRCCS - Humanitas Research Hospital

Via Manzoni 56, CAP 20089, Rozzano (MI), Italy

Email: [egesta.lopci@gmail.com](mailto:egesta.lopci@gmail.com)

[egesta.lopci@cancercenter.humanitas.it](mailto:egesta.lopci@cancercenter.humanitas.it)

Roberta Burnelli, MD

Pediatric Onco-hematologic Unit

University Hospital S. Anna, Ferrara, Italy

Email: [roberta.burnelli@unife.it](mailto:roberta.burnelli@unife.it)

Caterina Elia

AYA Oncology and Pediatric Radiotherapy Unit

CRO Centro di Riferimento Oncologico IRCCS, Aviano (PN), Italy

Email: [eliacaterina@libero.it](mailto:eliacaterina@libero.it)

1  
2  
3  
4  
5 Arnoldo Piccardo, MD  
6 Nuclear Medicine Department  
7 Galliera Hospital, Genoa, Italy.  
8  
9 Email: [arnoldo.piccardo@galliera.it](mailto:arnoldo.piccardo@galliera.it)  
10  
11  
12

13 Angelo Castello, MD  
14 Nuclear Medicine Department  
15 IRCCS - Humanitas Research Hospital  
16  
17 Via Manzoni 56, CAP 20089, Rozzano (MI), Italy  
18  
19 Email: [angelo.castello@humanitas.it](mailto:angelo.castello@humanitas.it)  
20  
21  
22

23 Eugenio Borsatti, MD  
24 Nuclear Medicine Department  
25  
26 CRO Centro di Riferimento Oncologico IRCCS, Aviano (PN), Italy  
27  
28 Email: [eborsatti@cro.it](mailto:eborsatti@cro.it)  
29  
30  
31

32 Pietro Zucchetta, MD  
33 Nuclear Medicine Department  
34  
35 University Hospital, Padova, Italy  
36  
37 Email: [pietro.zucchetta@unipd.it](mailto:pietro.zucchetta@unipd.it)  
38  
39  
40

41 Angelina Cistaro, MD  
42 Nuclear Medicine Department  
43  
44 Galliera Hospital, Genoa, Italy.  
45  
46 Email: [angelina.cistaro@galliera.it](mailto:angelina.cistaro@galliera.it)  
47  
48  
49

50 Maurizio Mascarin, MD  
51 AYA Oncology and Pediatric Radiotherapy Unit  
52  
53 CRO Centro di Riferimento Oncologico IRCCS, Aviano (PN), Italy  
54  
55 Email: [phl.italy@cro.it](mailto:phl.italy@cro.it); [mascarin@cro.it](mailto:mascarin@cro.it)  
56  
57  
58  
59  
60

## ABSTRACT

**Introduction:** Assessment of response to therapy in pediatric Hodgkin lymphoma (HL) patients by <sup>18</sup>F-fluorodeoxyglucose PET/CT (FDG PET) has become a powerful tool for the discrimination of responders from non-responders. The addition of volumetric and texture analyses can be regarded as a valuable help for disease prognostication and biological characterization. Based on these premises, the AIEOP Hodgkin Lymphoma Study Group has designed a prospective evaluation of volumetric and texture analysis in the Italian cohort of patients enrolled in the EuroNet-PHL-C2.

**Methods and Analysis:** The primary objective is to compare volumetric assessment in HL patients at baseline and during the course of therapy with standard visual and semi-quantitative analyses. The secondary objective is to identify the impact of volumetric and texture analysis on bulky masses. The tertiary objective is to determine the additional value of multiparametric assessment in patients having a partial response on morphological imaging.

The overall cohort of the study is expected to be round 400-500 patients, with approximately half presenting with bulky masses. All PET scans of the Italian cohort will be analyzed for volumetric assessment, comprising metabolic tumor volume (MTV) and total lesion glycolysis (TLG) at baseline and during the course of therapy. A dedicated software will delineate semi-automatically contours using different threshold methods, and the impact of each segmentation techniques will be evaluated. Bulky will be defined on contiguous lymph node masses  $\geq 200$ ml on CT/MRI. All bulky masses will be outlined and analyzed by the same software to provide textural features. Morphological assessment will be based in RECIL 2017 for response definition.

**Ethics and Dissemination:** The current study has been ethically approved (AIFA/SC/P/27087 approved 09/03/2018; EudraCT 2012-004053-88, EM-04). The results of the different analyses performed during and after study completion the will be actively disseminated through peer-reviewed journals, conference presentations, social media, print media and internet.

**Keywords:** FDG PET; Hodgkin's lymphoma; pediatric; volumetric analysis; response assessment; texture analysis; bulky masses; interim evaluation.

## STRENGTHS AND LIMITATIONS OF THE STUDY

- This study will represent the largest analysis on volumetric and semi-quantitative parameters in pediatric HL undergoing a therapeutic trial.
- The dedicated evaluation of texture features in HL bulky masses, will allow for a solid definition of the impact of radiomics in this large pediatric population.
- Thanks to a comparative disease evaluation with both metabolic (PET) and morphological (CT/MRI) parameters, we will be able to assess the added value of the technique in pediatric HL patients presenting with a partial response to therapy.
- The segmentation used for volumetric analyses can be considered a limit, since the predefined threshold methods might not be applicable for all lesions, particularly during response assessment; hence, a preliminary validation study will be performed.
- Data extraction for radiomic features will be necessarily performed in PET exams obtained from different scanners and undergoing different reconstruction algorithms, although harmonization based on EANM guidelines is recommended for the trial.

## **INTRODUCTION**

<sup>1</sup>  
<sup>2</sup>  
<sup>3</sup>  
<sup>4</sup>  
<sup>5</sup> <sup>18</sup>F-fluorodeoxyglucose positron emission tomography (FDG PET) has become a standard  
<sup>6</sup> diagnostic procedure for the assessment of response to therapy in adults and children with Hodgkin  
<sup>7</sup> lymphoma. International guidelines recommend the using of Deauville five-point scale as a visual  
<sup>8</sup> method for discriminating responders from non-responder patients [1, 2]. In 2014, the pediatric  
<sup>9</sup> German group proposed the use of qPET with the intent to extend the Deauville score to a  
<sup>10</sup> continuous scale and limit optical misinterpretation due to the influence of background activity [3,  
<sup>11</sup> 4]. This quantitative method is being applied in the current EuroNet-PHL-C2 clinical trial, in which  
<sup>12</sup> adapted therapy is based on quantitative FDG avidity of tumor masses on PET evaluation after 2  
<sup>13</sup> cycles of OEPA [5, 6]. This approach, however, postpones risk stratification at interim evaluation;  
<sup>14</sup> therefore, the definition of imaging baseline predictors is highly desirable.

<sup>15</sup> The implementation of metabolic tumor volume, as a sum of areas with an increased SUV inside  
<sup>16</sup> the tumor, as well as the characterization of the heterogeneity of tumor metabolic patterns on FDG  
<sup>17</sup> PET has become an emerging topic in nuclear medicine [7]. Several studies [8-11] have shown that  
<sup>18</sup> the addition of volumetric and textural parameters can be a valuable help for disease  
<sup>19</sup> prognostication and biological characterization of many tumor types, thus suggesting a similar  
<sup>20</sup> implication for pediatric Hodgkin lymphoma [12]. While the concept of “Radiomics”, consisting on  
<sup>21</sup> the extraction of a large quantity of features from digital images via data-characterization  
<sup>22</sup> algorithms has gained a proper place in predicting outcome and early metabolic response in adults  
<sup>23</sup> with malignant lymphoma [13, 14] On the other hand, the scientific background and the results  
<sup>24</sup> obtained from our previous studies in the context of the Italian AIEOP-LH2004 trial [15, 16]  
<sup>25</sup> suggest an additional impact of FDG PET in patients with or without bulky disease presenting with  
<sup>26</sup> residual masses on morphological evaluation with computed tomography (CT).

<sup>27</sup> Given the abovementioned premises, the AIEOP Hodgkin Lymphoma Study Group has planned to  
<sup>28</sup> perform in the Italian cohort of patients treated according to the EuroNet-PHL-C2 trial additional  
<sup>29</sup> volumetric analyses to improve the evaluation of tumor burden computed at baseline FDG PET and  
<sup>30</sup> to identify prognostic factors suitable for predicting early metabolic response to therapy in pediatric  
<sup>31</sup> Hodgkin lymphoma (HL). In case of bulky disease, further textural and shape analysis in the  
<sup>32</sup> baseline FDG PET will be performed to evaluate macroscopic and microscopic heterogeneity of  
<sup>33</sup> tumor masses, as reflection of their aggressiveness and different chemotherapy sensitivity.  
<sup>34</sup>  
<sup>35</sup>  
<sup>36</sup>  
<sup>37</sup>  
<sup>38</sup>  
<sup>39</sup>  
<sup>40</sup>  
<sup>41</sup>  
<sup>42</sup>  
<sup>43</sup>  
<sup>44</sup>  
<sup>45</sup>  
<sup>46</sup>  
<sup>47</sup>  
<sup>48</sup>  
<sup>49</sup>  
<sup>50</sup>  
<sup>51</sup>  
<sup>52</sup>  
<sup>53</sup>  
<sup>54</sup>  
<sup>55</sup>

## **METHODS AND ANALYSIS**

### **STUDY OBJECTIVES**

1  
2  
3 This is a prospective observational multicentric cohort study. The primary objective of the study is  
4 to compare the diagnostic and prognostic role of volumetric assessment in HL patients at baseline  
5 and during the course of therapy with standard visual (Deauville score) and semi-quantitative (i.e.  
6 SUVmax, SUVmean, SUVpeak) analyses.  
7  
8

9  
10 The secondary objective of the study is to identify the diagnostic and prognostic impact of texture  
11 analyses and the other metabolic parameters on bulky masses.  
12

13 The tertiary objective of the study is to determine the additional predictive and prognostic value of  
14 multiparametric assessment (i.e. SUVmax, SUVmean, SUVpeak, MTV, TLG and texture analysis)  
15 in HL patients having a partial response on morphological imaging.  
16  
17  
18

## 19 20 ELIGIBILITY CRITERIA

21  
22 In accordance to the EuroNet-PHL-C2 trial, the population of our study will include pediatric  
23 patients of the Italian cohort, aged <25 years, with histologically confirmed primary diagnosis of  
24 classical Hodgkin's lymphoma, who will undergo FDG PET at baseline (PET1), after two cycles of  
25 induction OEPA therapy (PET2), and after the end of chemotherapy (PET3), in case of PET2  
26 positive patients [17]. Patients will be stratified at baseline in one of the three Treatment Levels  
27 (TL) on basis of stage and risk factors, confirmed by central review: TL-1, TL-2, TL-3 for low,  
28 intermediate and advanced HL, respectively [6, 17].  
29  
30  
31  
32  
33  
34  
35

## 36 STUDY TIMELINE

37 The protocol herein illustrated represents a parallel study on PET imaging performed after the  
38 EuroNet-PHL-C2 trial amendment (Amendment Nr. 04, dated 2017-07-31) on the Italian cohort of  
39 patients. The study has been also submitted and approved by the Italian authority (AIFA) the date  
40 2018-03-09. Consequently, the timeline of the protocol will be as follows: I) enrollment period will  
41 start from the 10<sup>th</sup> of March 2018 until 31<sup>st</sup> of December 2020; II) follow-up period will last 5 years  
42 after last enrolment day; III) study completion is planned before 31<sup>st</sup> December 2025.  
43  
44  
45  
46  
47  
48  
49

## 50 METHODOLOGY

### 51 **Whole body assessment of HL**

52  
53 All FDG PET scans performed in the Italian cohort of patients undergoing the EuroNet-PHL-C2  
54 trail will be analyzed with additional volumetric assessment comprising metabolic tumor volume  
55 (MTV) and total lesion glycolysis (TLG) at baseline and during the course of therapy.  
56

57  
58 In each patient, HL lesions will be identified by visual analysis and corresponding SUVmax,  
59 SUVmean and SUVpeak [18] will be determined as the pixel with the highest value of uptake, the  
60

1  
2  
3 mean value of uptake and the average value of uptake in a VOI (volume of interest) of 1ml that  
4 surrounds the voxel with the highest activity, respectively. A dedicated software will be used to  
5 delineate, semi-automatically, contours of the lesions using different threshold methods and the  
6 impact of segmentation technique will be evaluated (**Figure 1**). More specifically, four threshold  
7 methods will be used based on previously reported methodologies [19-22]:  
8  
9

- 10 • Fixed 41% threshold of the SUVmax within the respective lymphoma site,
- 11 • Fixed absolute SUV threshold of 2.5;
- 12 • SUVmax(lesion)/SUVmean liver >1.5
- 13 • Adaptive method:  $I(\text{threshold}) = [0.15 \times I(\text{mean})] + I(\text{background})$ .  $I(\text{mean})$  is calculated as the  
14 mean intensity of all pixels surrounded by the 70%  $I_{\text{max}}$  isocontour within the tumor;  
15  $I(\text{background})$  is defined as a SUVmean of liver [23].

16  
17 After delineation of all individual lesions, patient MTV will be estimated as the sum of voxels with  
18 supra-threshold uptake, reported in ml, and TLG will be calculated as [MTV x SUVmean].

19 PET2 scans will be evaluated by visual analysis on the basis of Deauville-5-points-scale assigning  
20 Inadequate Response (IR) when at least one site shows FDG uptake higher than liver uptake (scores  
21 4 and 5). Additionally, the variation of SUVmax, determined as the percentage reduction between  
22 the SUVmax in the tumor site with the most intense uptake on PET1 and the SUVmax in the tumor  
23 site with the most intense uptake on PET2 ( $\Delta\text{SUVmax}$ ) [9], will be computed. Similarly, will be  
24 calculated the variation of SUVmean, SUVpeak, MTV, and TLG, respectively.

### 25 26 27 28 29 30 31 32 33 34 35 36 37 38 **Assessment of bulky masses and radiomics analyses**

39 The definition of bulky masses will be determined as specified in EuroNet-PHL-C2 [17]. More  
40 specifically, a volume of a contiguous lymph node mass  $\geq 200\text{ml}$ , measured by the three largest  
41 diameters on CT/MRI, will be considered as bulky. All bulky masses will be outlined using  
42 different threshold methods, as explained above, and analyzed on dedicated software for semi-  
43 quantitative and volumetric parameters. The same software will provide textural and shape features  
44 for radiomics analyses. The entire feature extraction will be performed using the freeware Local  
45 Image Features Extraction (LIFEx) software (<http://www.lifexsoft.org>) [24,25].

46 SUVmax will be defined as the maximum uptake in the segmented tumor. SUVmean will be  
47 measured as the average uptake in the tumor burden. SUVpeak will be computed as the average  
48 SUV in a 1ml region of tumor burden around the maximal SUV voxel. MTV will be the volume of  
49 the segmented tumor. TLG will be calculated as the product of SUVmean by MTV.

50 Among shape parameters, asphericity, convexity and 3D fractal dimensions will be computed [15,  
51 18, 26, 27]. For the characterization of tumor texture, two methods will be used as previously



1  
2  
3 reported [11, 28, 29]: analysis of the histogram of the voxel values within the tumor and the method  
4 accounting for the spatial arrangement of voxel values. By histogram-based method, on first-order  
5 statistics, will be computed SD (standard deviation), Entropy, Energy, kurtosis and Skewness. To  
6 define the spatial arrangement of the voxel values within the tumor, four matrices will be computed  
7 from each VOI: gray-level co-occurrence matrix (GLCM), neighborhood gray-level different matrix  
8 (NGLDM), gray-level zone length matrix (GLZLM) and gray-level run length matrix (GLRLM).  
9 All parameters obtainable by the software and possible limitations are better detailed at  
10 <http://www.lifexsoft.org> [24,25].  
11  
12  
13  
14  
15  
16  
17  
18

### 19 **Definition of morphological response**

20 In pediatric HL patients presenting with morphological partial response on bulky masses and/or  
21 residual lymph nodes with largest diameter  $\geq 2$  cm, a multiparametric assessment (i.e. SUVmax,  
22 SUVmean, SUVpeak, MTV, TLG and texture analysis) will be performed. For this purpose, the  
23 International Working Group consensus response evaluation criteria in lymphoma (RECIL 2017)  
24 will be used when necessary [30]. In particular, we will include in the analysis all cases with:  
25  
26  
27  
28

- 29 • Poor bulk response:  $< 50\%$  volume reduction and/or at least one nodal site with largest diameter  
30 of  $\geq 2$  cm and non-assessable qPET-value due to brown fatty tissue [17].
- 31 • Partial Response:  $\geq 30\%$  decrease in the sum of longest diameters of target lesions but no  
32 complete response; positive PET (DS 4–5); any bone marrow involvement, no new lesions [30].
- 33 • Minor Response:  $\geq 10\%$  decrease in the sum of longest diameters of target lesions but not a  
34 partial response [30].  
35  
36  
37  
38  
39  
40

### 41 **Sample size calculation**

42 Given the limited number of robust data for volumetric and texture analysis in pediatric HL  
43 population, we considered adequate a sample size comprising all eligible patients. In the current  
44 study, we expect to enroll minimum 50-80 patients per year from the Italian Hodgkin Lymphoma  
45 Group out for the different AIEOP Italian Centers. Based on the data derived from the previous  
46 AIEOP-LH2004 trial, the estimated number of bulky masses is quoted around 50% of the enrolled  
47 cases. Consequently, the overall cohort to be included in the study is expected of round 400-500  
48 patients, with half presenting with bulky masses, eligible for dedicated analyses.  
49  
50  
51  
52  
53  
54  
55  
56

### 57 **PATIENT AND PUBLIC INVOLVEMENT**

58 No patient involved  
59  
60

## STATISTICAL ANALYSIS

Descriptive statistics will be performed using conventional metrics (mean, median, range). All metabolic and heterogeneity parameters will be correlated with each other and with the disease outcome and their diagnostic and prognostic role will be investigated. For continuous data, differences between groups will be compared by the T test or the Wilcoxon test, when appropriate. For rank correlation, we will use Spearman' correlation coefficient ( $\rho$ ). The different threshold methods used to outline all individual lesions will be compared by the Pearson correlation coefficient, linear regression, Bland-Altman and logistic regression. Optimal cut-off values of the metabolic parameters and, in patients with bulky mass, also of textural/radiomics parameters for distinguishing inadequate response (IR) from adequate response (AR) to therapy will be defined by receiver operating characteristic (ROC) curves with respective areas under the curve (AUC). Patients with or without bulky mass will be divided into groups of complete metabolic response (CMR), partial metabolic response (PMR), no metabolic response (NMR) and progressive metabolic disease (PMD) and differences in metabolic and textural parameters will be investigated by analysis of variance (ANOVA). Linear regression will be applied to determine the relationship between response and all other variables. Statistical significance will be set for  $p < 0.05$ .

## **DISCUSSION**

In literature there is evidence that metabolically active tumor volume determined by PET/CT is more advantageous than tumor volume measured by CT or MRI for predicting response to treatment in various malignancies afflicting both adult and the pediatric population. More specifically, in adult population, recent publications have demonstrated that the measurement of 3-dimensional disease volume (MTV) and metabolic activity (TLG) [14] can help predict outcomes in HL patients [8, 9, 14, 30-32]. This might suggest a similar implication also in pediatric HL, where the tumor volume may not change because of overlapping inflammatory processes correlated to therapy, while early changes of metabolic activity are most frequently reported.

Along with the above mentioned semi-quantitative parameters, it is possible to extract other quantitative features from PET-CT images, including intensity, heterogeneity, and shape within the tumor, potentially reflecting underlying biological characteristics [14]. These characteristics are embedded in the so called "Radiomics", a translational field of research aiming to extract high-dimensional data from clinical images to predict underlying biological characteristics of the disease [33]. Radiomic features are correlated to prognostic markers in cancer (i.e. hypoxia, angiogenesis, proliferation, etc.) and might be utilized for tumor response prediction and outcome prognostication. In pediatric population, especially in case of advanced stage disease, high dose

1  
2  
3 therapeutic regimens represent the standard to cure, yet at the expense of early and delayed side  
4 effects [34]. In this context, it becomes even more important to identify those factors capable of  
5 limiting the doses to the necessary therapeutic effect while reducing at maximum the undesirable  
6 consequences. These prerogatives have guided in the last decades clinical research in adult [35, 36]  
7 and pediatric HL [6, 17].  
8  
9

10 In the present study, we aim to identify prospectively the role of volumetric and texture (radiomic)  
11 characteristics better fulfilling the need for predictive and prognostic factors in pediatric HL.  
12 Thanks to a large sample size and to a preliminary methodological validation, we expect to obtain  
13 significant data on the added value of volumetric and texture analysis on FDG PET assessment in  
14 pediatric Hodgkin Lymphoma.  
15  
16  
17  
18  
19  
20  
21  
22  
23  
24  
25  
26  
27  
28  
29  
30  
31  
32  
33  
34  
35  
36  
37  
38  
39  
40  
41  
42  
43  
44  
45  
46  
47  
48  
49  
50  
51  
52  
53  
54  
55  
56  
57  
58  
59  
60

### **ETHICS AND DISSEMINATION:**

The current study has been approved by AIFA (Agenzia Italiana del Farmaco) the 9<sup>th</sup> of March 2018 (EudraCT 2012-004053-88, EM-04; AIFA/SC/P/27087 approved 09/03/2018). All procedures involving human participants will be performed in accordance with the ethical standards of the institutional and/or national research committee and with the principles of the 1964 Declaration of Helsinki and its later amendments or comparable ethical standards. All patients will sign a written informed consent to participate in the study. The results of the different analyses performed during and after study completion will be actively disseminated through peer-reviewed journals, conference presentations, social media, print media and internet.

1  
2  
3  
4  
5  
6  
7  
8  
9  
10  
11  
12  
13  
14  
15  
16  
17  
18  
19  
20  
21  
22  
23  
24  
25  
26  
27  
28  
29  
30  
31  
32  
33  
34  
35  
36  
37  
38  
39  
40  
41  
42  
43  
44  
45  
46  
47  
48  
49  
50  
51  
52  
53  
54  
55  
56  
57  
58  
59  
60

## REFERENCES

1. Cheson, B.D., et al. Recommendations for Initial Evaluation, Staging, and Response Assessment of Hodgkin and Non-Hodgkin Lymphoma: The Lugano Classification. *J Clin Oncol.* 2014, Vol. 32, 27, p. 3059-67.
2. Barrington, S.F., et al. Role of Imaging in the Staging and Response Assessment of Lymphoma: Consensus of International Conference on Malignant Lymphomas Imaging Working Group. *J Clin Oncol.* 2014, Vol. 32, 27, p. 3048-58.
3. Barrington, S.F., et al. FDG PET for therapy monitoring in Hodgkin and non-Hodgkin lymphoma. *Eur J Nucl Med Mol Imaging.* 2017, Vol. 44, p. 97-110.
4. Hasenclever D., et al. qPET – a quantitative extension of the Deauville scale to assess response in interim FDG-PET scans in lymphoma. *Eur J Nucl Med Mol Imaging.* 2014, Vol. 41, p. 1301-8.
5. Mauz-Körholz C., et al. Procarbazine-free OEPA-COPDAC chemotherapy in boys and standard OPPA-COPP in girls have comparable effectiveness in pediatric Hodgkin's lymphoma: the GPOH-HD-2002 study. *J Clin Oncol.* 2016, Vol. 28, 23, p. 3680-6.
6. Rogasch JMM, et al. Pretherapeutic FDG-PET total metabolic tumor volume predicts response to induction therapy in pediatric Hodgkin's lymphoma. *BMC Cancer.* 2018; Vol. 18: p.521
7. Kostakoglu, L., et al. FDG-PET imaging for Hodgkin Lymphoma: Current use and future applications. *Clin Adv Hematol Oncol.* 2014, Vol. 12, p. 20-35.
8. Meignan, M., et al. Metabolic tumour volumes measured at staging in lymphoma: Methodological evaluation on phantom experiments and patients. *Eur J Nucl Med Mol Imaging.* 2014, Vol. 41, p. 1113-1122.
9. Kanoun, S., et al. Baseline metabolic tumour volume is an independent prognostic factor in Hodgkin lymphoma. *Nucl Med Mol Imaging.* 2014, Vol. 41, p. 1735-1743.
10. Brooks, F.J., et al. Low-order non-spatial effects dominate second-order spatial effects in the texture quantifier analysis of 18F-FDG-PET images. *PLoS One.* 2015, Vol. 10, p. e0116574.
11. Buvat, I., et al. Tumor texture analysis in PET: Where do we stand? *J Nucl Med.* 2015, Vol. 56, p. 1642-44.
12. Kluge, R., et al. Current Role of FDG-PET in Pediatric Hodgkin's Lymphoma. *Semin Nucl Med.* 2017, Vol. 47, p. 242-257.

13. Ben Bouallegue, F. et al. Association between textural and morphological tumor indices on baseline PET-CT and early metabolic response on interim PET-CT in bulky malignant lymphomas. *Med Phys* 2017; Vol. 44, p. 4608–4619.
14. Milgrom, S.A., et al. A PET Radiomics Model to Predict Refractory Mediastinal Hodgkin Lymphoma. *Sci Rep.* 2019, Vol. 9, p. 1322.
15. Lopci, E., et al. Postchemotherapy PET evaluation correlates with patient outcome in paediatric Hodgkin's disease. *Eur J Nucl Med Mol Imaging.* 2011, Vol. 38, 9, p. 1620-7.
16. Lopci, E., et al. Additional role of FDG-PET in paediatric HD patients presenting with a partial response on CT: data deriving from a multicentric Italian study. *Eur J Nucl Med Mol Imaging.* 2012, Vol. 39, p. S155–S303.
17. Second International Inter-Group Study for Classical Hodgkin Lymphoma in Children and Adolescents. Final protocol version, 1st amendment. <https://clinicaltrials.gov/ct2/show/NCT02684708>.
18. Vanderhoek, M., et al. Impact of the Definition of Peak Standardized Uptake Value on Quantification of Treatment Response. *J Nucl Med.* 2012, Vol. 53, p. 4-11.
19. Boellaard, R., et al. FDG PET and PET/CT: EANM procedure guidelines for tumour PET imaging: version 1.0. *Eur J Nucl Med Mol Imaging.* 2010, Vol. 37, p. 181-200.
20. Ben Bouallègue, F., et al. Association between textural and morphological tumor indices on baseline PET-CT and early metabolic response on interim PET-CT in bulky malignant lymphomas. *Med Phys.* 2017, Vol. 44, p. 4608-19.
21. Mettler, J., et al. Metabolic Tumour Volume for Response Prediction in Advanced-Stage Hodgkin Lymphoma. *J Nucl Med.* 2018.
22. Cottreau, A.S., et al. Prognostic value of baseline metabolic tumor volume in early-stage Hodgkin lymphoma in the standard arm of the H10 trial. *Blood.* 2018, Vol. 131, p. 1456-63.
23. Nestle U., et al. Comparison of different methods for delineation of 18F-FDG PET-positive tissue for target volume definition in radiotherapy of patients with non-Small cell lung cancer. *J Nucl Med.* 2005; Vol. 46: p.1342-8.

- 1
  - 2
  - 3
  - 4
  - 5
  - 6
  - 7
  - 8
  - 9
  - 10
  - 11
  - 12
  - 13
  - 14
  - 15
  - 16
  - 17
  - 18
  - 19
  - 20
  - 21
  - 22
  - 23
  - 24
  - 25
  - 26
  - 27
  - 28
  - 29
  - 30
  - 31
  - 32
  - 33
  - 34
  - 35
  - 36
  - 37
  - 38
  - 39
  - 40
  - 41
  - 42
  - 43
  - 44
  - 45
  - 46
  - 47
  - 48
  - 49
  - 50
  - 51
  - 52
  - 53
  - 54
  - 55
  - 56
  - 57
  - 58
  - 59
  - 60
24. Nioche. C., et al. A software for characterizing intra-tumor heterogeneity in multimodality imaging and establishing reference charts. *Eur J Nucl Med Mol Imaging*. 2016; Vol. 43: S156-S157.
25. Parvez, A., et al. 18F-FDG PET/CT metabolic tumor parameters and radiomics features in aggressive non-Hodgkin's lymphoma as predictors of treatment outcome and survival. *Ann Nucl Med*. 2018; Vol. 32,p. 410–416.
26. Castello, A., et al. Prognostic Impact of Intratumoral Heterogeneity Based on Fractal Geometry Analysis in Operated NSCLC Patients. *Mol Imaging Biol*. 2018, p. 965–972.
27. Grizzi, F., et al. The Complexity and Fractal Geometry of Nuclear Medicine Images. *Mol Imaging Biol*. 2018, p. 401–409.
28. Orlhac, F., et al. Tumor Texture Analysis in 18F-FDG PET: Relationships Between Texture Parameters, Histogram Indices, Standardized Uptake Values, Metabolic Volumes, and Total Lesion Glycolysis. *J Nucl Med*. 2014, Vol. 55, p. 414-422.
29. Ganeshan, B., et al. CT-based texture analysis potentially provides prognostic information complementary to interim fdg-pet for patients with hodgkin's and aggressive non-hodgkin's lymphomas. *Eur Radiol*. 2017, Vol. 27, p. 1012-1020.
30. Younes A. et al, International Working Group consensus response evaluation criteria in lymphoma (RECIL 2017). *Ann Oncol*. 2017;Vol. 28: P. 1436-1447.
31. Song MK. et al., Metabolic tumor volume by positron emission tomography/computed tomography as a clinical parameter to determine therapeutic modality for early stage Hodgkin's lymphoma. *Cancer Sci* 2013; Vol. 104: p. 1656-61.
32. Akhtari M., et al. Reclassifying patients with early-stage Hodgkin lymphoma based on functional radiographic markers at presentation. *Blood*. 2018; Vol. 131: p. 84-94.
33. Rizzo S, et al. Radiomics: the facts and the challenges of image analysis. *Eur Radiol Exp* 2018;2:36.
34. Lackner H., et al, Prospectiveevaluation of late effects after childhood cancer therapy with follow-up over 9 years. *Eur J Pediatr* 2000; Vol. 159: p. 750-758.

- 1  
2  
3 35. Borchmann P, et al. PET-guided treatment in patients with advanced-stage Hodgkin's  
4 lymphoma (HD18): final results of an open-label, international, randomised phase 3 trial by the  
5 German Hodgkin study group. *Lancet*. 2018;Vol. 390: p. 2790–802.  
6  
7  
8  
9 36. Casasnovas RO, et al. PET-adapted treatment for newly diagnosed advanced Hodgkin  
10 lymphoma (AHL2011): a randomised, multicentre, non-inferiority, phase 3 study. *Lancet*  
11 *Oncol* 2019; Vol. 20: p. 202-215.  
12  
13  
14  
15  
16  
17  
18  
19  
20  
21  
22  
23  
24  
25  
26  
27  
28  
29  
30  
31  
32  
33  
34  
35  
36  
37  
38  
39  
40  
41  
42  
43  
44  
45  
46  
47  
48  
49  
50  
51  
52  
53  
54  
55  
56  
57  
58  
59  
60

For peer review only



1  
2  
3  
4  
5  
6  
7  
8  
9  
10  
11  
12  
13  
14  
15  
16  
17  
18  
19  
20  
21  
22  
23  
24  
25  
26  
27  
28  
29  
30  
31  
32  
33  
34  
35  
36  
37  
38  
39  
40  
41  
42  
43  
44  
45  
46  
47  
48  
49  
50  
51  
52  
53  
54  
55  
56  
57  
58  
59  
60

### **AUTHORS' CONTRIBUTION**

Egesta Lopci contributed in planning, conception, design, study coordination and conduct, data acquisition, analysis, interpretation, and reporting of the work in the current paper; Caterina Elia contributed in planning, study coordination and conduct, data collection and final approval of manuscript; Roberta Burnelli contributed in planning, study coordination and conduct, data collection and final approval of manuscript; Arnaldo Piccardo, Angelo Castello, Eugenio Borsatti, Pietro Zucchetto and Angelina Cistaro contributed in study conduct, data collection and final approval of manuscript; Maurizio Mascarin contributed in planning, conception, design, study coordination and conduct, data collection and final approval of manuscript. AIEOP Centers for the Hodgkin Lymphoma Study Group contribute for the medical care of all study participants.

### **COMPETING INTERESTS**

The author(s) declare that they have no competing interests.

### **FUNDING**

Fondazione Umberto Veronesi has provided support to the study with three fellowship grants. AGMEN (Associazione Genitori Malati Emato-Oncologici) is supporting the study by covering the expenses for the central revision platform of the trial.

### **ACKNOWLEDGEMENTS**

AIEOP (Associazione Italiana Ematologia Oncologia Pediatrica) Hodgkin Lymphoma Study Group. The authors would like to thank E. Mazziotti for the support in the study analyses.

## FIGURE LEGEND

**Figure 1:** Comparative representation of the four segmentation techniques applied in our study protocol illustrated from left to right: fixed 41% threshold (V41%); fixed absolute SUV threshold of 2.5 (V2.5); SUVmax(lesion)/SUVmean liver >1.5 (Vliver); and adaptative method (AM). The same HL patient has been analyzed according to the above mentioned techniques and corresponding TMTV (total metabolic tumor volumes) at baseline have been displayed for comparison.

For peer review only

1  
2  
3  
4  
5  
6  
7  
8  
9  
10  
11  
12  
13  
14  
15  
16  
17  
18  
19  
20  
21  
22  
23  
24  
25  
26  
27  
28  
29  
30  
31  
32  
33  
34  
35  
36  
37  
38  
39  
40  
41  
42  
43  
44

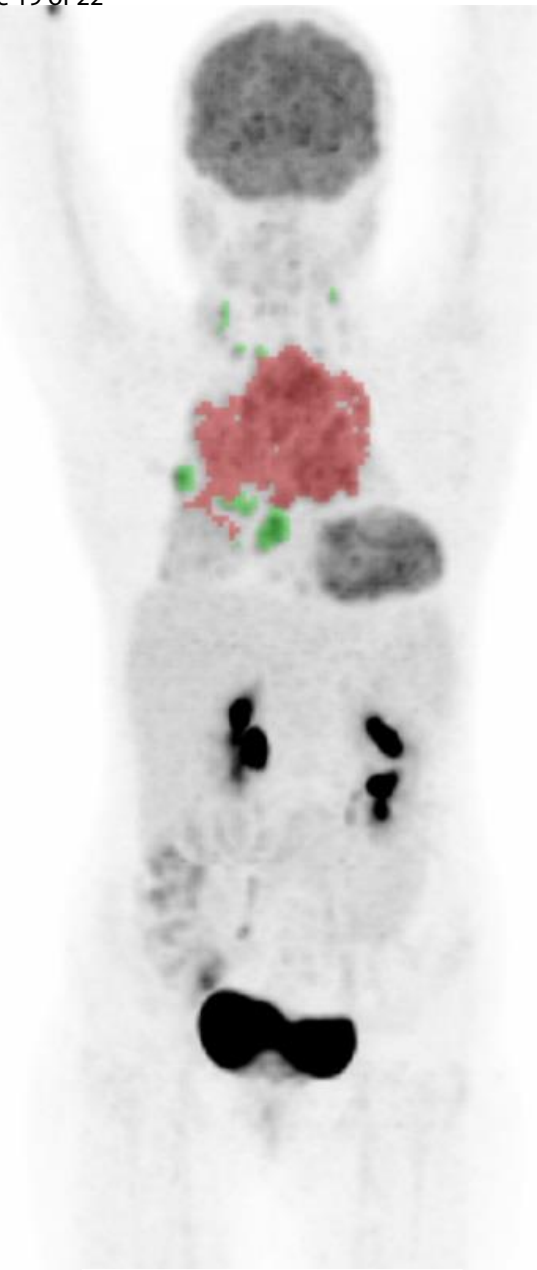

TMTV (V41%) Baseline

242,30



TMTV (V2.5) Baseline

471,00

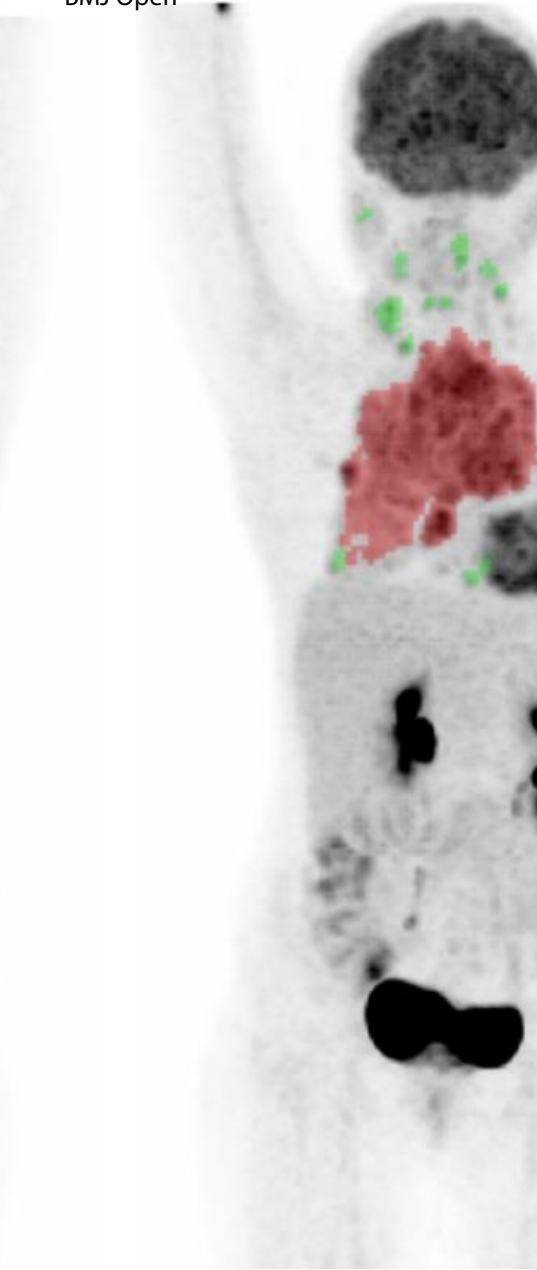

TMTV (Vliver) Baseline

500,40

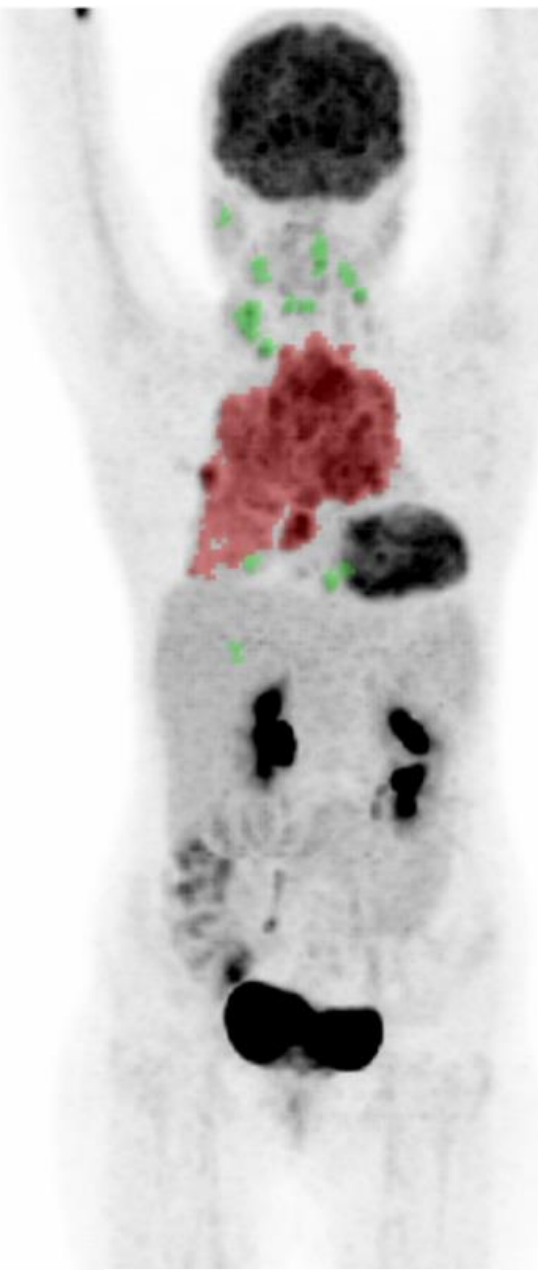

TMTV (AM) Baseline

538,3



STANDARD PROTOCOL ITEMS: RECOMMENDATIONS FOR INTERVENTIONAL TRIALS

SPIRIT 2013 Checklist: Recommended items to address in a clinical trial protocol and related documents\*

| Section/item                      | Item No | Description                                                                                                                                                                                                                                                                                                                                                                                                                                                                                                                                                                                                                                                                                                                                                                                                              |
|-----------------------------------|---------|--------------------------------------------------------------------------------------------------------------------------------------------------------------------------------------------------------------------------------------------------------------------------------------------------------------------------------------------------------------------------------------------------------------------------------------------------------------------------------------------------------------------------------------------------------------------------------------------------------------------------------------------------------------------------------------------------------------------------------------------------------------------------------------------------------------------------|
| <b>Administrative information</b> |         |                                                                                                                                                                                                                                                                                                                                                                                                                                                                                                                                                                                                                                                                                                                                                                                                                          |
| Title                             | 1       | Additional value of volumetric and texture analysis on FDG PET assessment in pediatric Hodgkin Lymphoma in the context of the euronet-PHL-C2-Trial.                                                                                                                                                                                                                                                                                                                                                                                                                                                                                                                                                                                                                                                                      |
| Trial registration                | 2a      | EudraCT 2012-004053-88, EM-04;                                                                                                                                                                                                                                                                                                                                                                                                                                                                                                                                                                                                                                                                                                                                                                                           |
|                                   | 2b      | AIFA/SC/P/27087 approved 9th of March 2018                                                                                                                                                                                                                                                                                                                                                                                                                                                                                                                                                                                                                                                                                                                                                                               |
| Protocol version                  | 3       | Amendment Nr. 04 to the protocol 4.0 final version 2017-07-31                                                                                                                                                                                                                                                                                                                                                                                                                                                                                                                                                                                                                                                                                                                                                            |
| Funding                           | 4       | Declarations, article page 10                                                                                                                                                                                                                                                                                                                                                                                                                                                                                                                                                                                                                                                                                                                                                                                            |
| Roles and responsibilities        | 5a      | Responsible investigators:<br>Egest Lopci, MD, PhD, Nuclear Medicine, IRCCS - Humanitas Research Hospital, Rozzano (MI), Italy<br>Maurizio Mascarin, MD, AYA and Pediatric Radiotherapy IRCCS Centro di Riferimento Oncologico<br>Roberta Burnelli, MD, Pediatric Onco-hematologic Unit, University Hospital S. Anna, Ferrara<br>Caterina Elia, AYA and Pediatric Radiotherapy, IRCCS Centro di Riferimento Oncologico<br>Arnoldo Piccardo, MD, Nuclear Medicine department, Galliera Hospital, Genoa, Italy.<br>Eugenio Borsatti, MD, Nuclear Medicine department, Centro di Riferimento Oncologico, Aviano, Pordenone, Italy<br>Pietro Zucchetta, MD, Nuclear Medicine Department, University Hospital, Padova, Italy<br>Angelina Cistaro, MD, Positron Emission Tomography Centre, IRMET S.p.A. Affidea, Turin, Italy |
|                                   | 5b      | Maurizio Mascarin, MD, AYA and Pediatric Radiotherapy IRCCS Centro di Riferimento Oncologico                                                                                                                                                                                                                                                                                                                                                                                                                                                                                                                                                                                                                                                                                                                             |
|                                   | 5c      | As per EuroNet-PHL-C2 amendment Nr. 04 to the protocol 4.0 final version 2017-07-31 and AIEOP Hodgkin Lymphoma Study Group                                                                                                                                                                                                                                                                                                                                                                                                                                                                                                                                                                                                                                                                                               |
|                                   | 5d      | As per EuroNet-PHL-C2 amendment Nr. 04 to the protocol 4.0 final version 2017-07-31 and AIEOP Hodgkin Lymphoma Study Group                                                                                                                                                                                                                                                                                                                                                                                                                                                                                                                                                                                                                                                                                               |
|                                   |         |                                                                                                                                                                                                                                                                                                                                                                                                                                                                                                                                                                                                                                                                                                                                                                                                                          |

**Introduction**

|    |                |    |                                                                |
|----|----------------|----|----------------------------------------------------------------|
| 1  |                |    |                                                                |
| 2  | Background and | 6a | Background, article page 4                                     |
| 3  | rationale      |    |                                                                |
| 4  |                |    |                                                                |
| 5  |                | 6b | Background, article page 4                                     |
| 6  |                |    |                                                                |
| 7  | Objectives     | 7  | Study objectives, article page 4                               |
| 8  |                |    |                                                                |
| 9  | Trial design   | 8  | This is a prospective observational multicentric cohort study. |
| 10 |                |    |                                                                |
| 11 |                |    |                                                                |
| 12 |                |    |                                                                |
| 13 |                |    |                                                                |
| 14 |                |    |                                                                |

### Methods: Participants, interventions, and outcomes

|    |                      |     |                                                                                     |
|----|----------------------|-----|-------------------------------------------------------------------------------------|
| 15 |                      |     |                                                                                     |
| 16 |                      |     |                                                                                     |
| 17 | Study setting        | 9   | As per EuroNet-PHL-C2 amendment Nr. 04 to the protocol 4.0 final version 2017-07-31 |
| 18 |                      |     |                                                                                     |
| 19 |                      |     |                                                                                     |
| 20 | Eligibility criteria | 10  | Eligibility criteria, article page 5                                                |
| 21 |                      |     |                                                                                     |
| 22 | Interventions        | 11a | N/A                                                                                 |
| 23 |                      |     |                                                                                     |
| 24 |                      | 11b | As per EuroNet-PHL-C2 amendment Nr. 04 to the protocol 4.0 final version 2017-07-31 |
| 25 |                      |     |                                                                                     |
| 26 |                      | 11c | As per EuroNet-PHL-C2 amendment Nr. 04 to the protocol 4.0 final version 2017-07-31 |
| 27 |                      |     |                                                                                     |
| 28 |                      | 11d | As per EuroNet-PHL-C2 amendment Nr. 04 to the protocol 4.0 final version 2017-07-31 |
| 29 |                      |     |                                                                                     |
| 30 |                      |     |                                                                                     |
| 31 |                      |     |                                                                                     |
| 32 |                      |     |                                                                                     |
| 33 | Outcomes             | 12  | Study objectives, article page                                                      |
| 34 |                      |     |                                                                                     |
| 35 | Participant          | 13  | As per EuroNet-PHL-C2 amendment Nr. 04 to the protocol 4.0 final version 2017-07-31 |
| 36 | timeline             |     |                                                                                     |
| 37 |                      |     |                                                                                     |
| 38 |                      |     |                                                                                     |
| 39 | Sample size          | 14  | Sample size calculation, article page 7                                             |
| 40 |                      |     |                                                                                     |
| 41 | Recruitment          | 15  | AIEOP Hodgkin Lymphoma Study Group                                                  |
| 42 |                      |     |                                                                                     |

### Methods: Assignment of interventions (for controlled trials)

#### Allocation:

|    |                |     |                                                                                     |
|----|----------------|-----|-------------------------------------------------------------------------------------|
| 43 |                |     |                                                                                     |
| 44 |                |     |                                                                                     |
| 45 |                |     |                                                                                     |
| 46 |                |     |                                                                                     |
| 47 | Sequence       | 16a | As per EuroNet-PHL-C2 amendment Nr. 04 to the protocol 4.0 final version 2017-07-31 |
| 48 | generation     |     |                                                                                     |
| 49 |                |     |                                                                                     |
| 50 | Allocation     | 16b | As per EuroNet-PHL-C2 amendment Nr. 04 to the protocol 4.0 final version 2017-07-31 |
| 51 | concealment    |     |                                                                                     |
| 52 | mechanism      |     |                                                                                     |
| 53 |                |     |                                                                                     |
| 54 | Implementation | 16c | As per EuroNet-PHL-C2 amendment Nr. 04 to the protocol 4.0 final version 2017-07-31 |
| 55 |                |     |                                                                                     |
| 56 |                |     |                                                                                     |
| 57 |                |     |                                                                                     |
| 58 | Blinding       | 17a | Open label                                                                          |
| 59 | (masking)      |     |                                                                                     |
| 60 |                |     |                                                                                     |

1  
2  
3  
4  
5  
6  
7  
8  
9  
10  
11  
12  
13  
14  
15  
16  
17  
18  
19  
20  
21  
22  
23  
24  
25  
26  
27  
28  
29  
30  
31  
32  
33  
34  
35  
36  
37  
38  
39  
40  
41  
42  
43  
44  
45  
46  
47  
48  
49  
50  
51  
52  
53  
54  
55  
56  
57  
58  
59  
60

17b N/A

### Methods: Data collection, management, and analysis

|                         |     |                                                                                                                             |
|-------------------------|-----|-----------------------------------------------------------------------------------------------------------------------------|
| Data collection methods | 18a | Statistical Analysis, article page 7                                                                                        |
|                         | 18b | As per EuroNet-PHL-C2 amendment Nr. 04 to the protocol 4.0 final version 2017-07-31 and AIEOP Hodgkin Lymphoma Study Group  |
| Data management         | 19  | As per EuroNet-PHL-C2 amendment Nr. 04 to the protocol 4.0 final version 2017-07-31 and AIEOP Hodgkin Lymphoma Study Group  |
| Statistical methods     | 20a | Statistical Analysis, article page 7                                                                                        |
|                         | 20b | Statistical Analysis, article page 7                                                                                        |
|                         | 20c | As per EuroNet-PHL-C2 amendment Nr. 04 to the protocol 4.0 final version 2017-07-31 and AIEOP Hodgkin Lymphoma Study Group) |

### Methods: Monitoring

|                 |     |                                                                                                                            |
|-----------------|-----|----------------------------------------------------------------------------------------------------------------------------|
| Data monitoring | 21a | As per EuroNet-PHL-C2 amendment Nr. 04 to the protocol 4.0 final version 2017-07-31 and AIEOP Hodgkin Lymphoma Study Group |
|                 | 21b | As per EuroNet-PHL-C2 amendment Nr. 04 to the protocol 4.0 final version 2017-07-31 and AIEOP Hodgkin Lymphoma Study Group |
| Harms           | 22  | As per EuroNet-PHL-C2 amendment Nr. 04 to the protocol 4.0 final version 2017-07-31 and AIEOP Hodgkin Lymphoma Study Group |
| Auditing        | 23  | As per EuroNet-PHL-C2 amendment Nr. 04 to the protocol 4.0 final version 2017-07-31 and AIEOP Hodgkin Lymphoma Study Group |

### Ethics and dissemination

|                          |     |                                                                                                              |
|--------------------------|-----|--------------------------------------------------------------------------------------------------------------|
| Research ethics approval | 24  | The protocol has been already board (REC/IRB) approved                                                       |
| Protocol amendments      | 25  | N/A                                                                                                          |
| Consent or assent        | 26a | Local investigators affiliated to the AIEOP (Associazione Italiana Ematologia Oncologia Pediatrica) centers. |
|                          | 26b | N/A                                                                                                          |
| Confidentiality          | 27  | As per EuroNet-PHL-C2 protocol and AIEOP policy                                                              |
| Declaration of interests | 28  | Declarations, article page 10                                                                                |
| Access to data           | 29  | As per EuroNet-PHL-C2 protocol and AIEOP policy                                                              |

|    |                 |     |                                                                         |
|----|-----------------|-----|-------------------------------------------------------------------------|
| 1  |                 |     |                                                                         |
| 2  | Ancillary and   | 30  | N/A                                                                     |
| 3  | post-trial care |     |                                                                         |
| 4  |                 |     |                                                                         |
| 5  | Dissemination   | 31a | Trial results will be communicated to participants, healthcare          |
| 6  | policy          |     | professionals, the public, and other relevant groups via scientific and |
| 7  |                 |     | congress publications.                                                  |
| 8  |                 |     |                                                                         |
| 9  |                 | 31b | Authorship eligibility will be provided to investigators based on their |
| 10 |                 |     | contribution to the study.                                              |
| 11 |                 |     |                                                                         |
| 12 |                 | 31c | As per EuroNet-PHL-C2 protocol and AIEOP policy                         |
| 13 |                 |     |                                                                         |
| 14 |                 |     |                                                                         |

### Appendices

|    |                  |    |                                                                  |
|----|------------------|----|------------------------------------------------------------------|
| 15 |                  |    |                                                                  |
| 16 |                  |    |                                                                  |
| 17 | Informed consent | 32 | As per EuroNet-PHL-C2 amendment Nr. 04 to the protocol 4.0 final |
| 18 | materials        |    | version 2017-07-31                                               |
| 19 |                  |    |                                                                  |
| 20 | Biological       | 33 | N/A                                                              |
| 21 | specimens        |    |                                                                  |
| 22 |                  |    |                                                                  |

---

\*It is strongly recommended that this checklist be read in conjunction with the SPIRIT 2013 Explanation & Elaboration for important clarification on the items. Amendments to the protocol should be tracked and dated. The SPIRIT checklist is copyrighted by the SPIRIT Group under the Creative Commons "[Attribution-NonCommercial-NoDerivs 3.0 Unported](https://creativecommons.org/licenses/by-nc-nd/3.0/)" license.
